# Supplementary material for: IL-18R supported CAR T cells targeting oncofetal tenascin C for the immunotherapy of pediatric sarcoma and brain tumors
Source: PubMed Central journal article supplement — J Immunother Cancer. 2024 Nov 20;12(11):e009743. doi: 10.1136/jitc-2024-009743 (PMC11580246; doi:10.1136/jitc-2024-009743), 2024-11-20
Supplement: jitc-12-11-s001.pdf [file jitc-12-11-s001.pdf]

Supplemental Table 1. PDX Sample Information

| PDX Name       | Dx  | Status       | Location            | Common Mutations                                               | Tx  | Link                                                                                                          |
|----------------|-----|--------------|---------------------|----------------------------------------------------------------|-----|---------------------------------------------------------------------------------------------------------------|
| SJOS030605_X1  | OS  | Rec, Met     | Chest Wall          | TP53                                                           | Yes | <a href="https://cstn.stjude.cloud/sample/SJOS030605_X1">https://cstn.stjude.cloud/sample/SJOS030605_X1</a>   |
| SJOS001105_X1  |     | Rec, Met     | Femur               | TP53, DLG2, TBC1D16, WRNIP1, GABRB1, SEC1P                     | No  | <a href="https://cstn.stjude.cloud/sample/SJOS001105_X1">https://cstn.stjude.cloud/sample/SJOS001105_X1</a>   |
| SJOS030597_X1  |     | Rec, Primary | Femur               | NR                                                             | No  | <a href="https://cstn.stjude.cloud/sample/SJOS030597_X1">https://cstn.stjude.cloud/sample/SJOS030597_X1</a>   |
| SJOS030272_X1  |     | Rec, Primary | Femur               | TP53, STX8, ARTX, TBC1D16, GABRB1, SYN3                        | Yes | <a href="https://cstn.stjude.cloud/sample/SJOS030272_X1">https://cstn.stjude.cloud/sample/SJOS030272_X1</a>   |
| SJEWS063834_X1 | EWS | Rec, Met     | Chest Wall          | EWSR1, FLI1                                                    | No  | <a href="https://cstn.stjude.cloud/sample/SJEWS063834_X1">https://cstn.stjude.cloud/sample/SJEWS063834_X1</a> |
| SJEWS049193_X1 |     | Rec, Met     | Lung                | EWSR1, FLI1, TP53, MIR5009                                     | Yes | <a href="https://cstn.stjude.cloud/sample/SJEWS049193_X1">https://cstn.stjude.cloud/sample/SJEWS049193_X1</a> |
| SJEWS063826_X1 |     | Rec, Met     | Axilla              | EWSR1, FLI1, TP53, ERG                                         | No  | <a href="https://cstn.stjude.cloud/sample/SJEWS063826_X1">https://cstn.stjude.cloud/sample/SJEWS063826_X1</a> |
| SJEWS063829_X1 |     | Primary      | Femur               | NR                                                             | Yes | <a href="https://cstn.stjude.cloud/sample/SJEWS063829_X1">https://cstn.stjude.cloud/sample/SJEWS063829_X1</a> |
| SJRHB015721_X1 | RMS | Rec, Met     | Retroperitoneum     | NR                                                             | Yes | <a href="https://cstn.stjude.cloud/sample/SJRHB015721_X1">https://cstn.stjude.cloud/sample/SJRHB015721_X1</a> |
| SJRHB000026_X1 |     | Rec, Primary | Pelvis              | PIK3CA, HRAS, NOCTH1, LRP1B, CDKN2A                            | No  | <a href="https://cstn.stjude.cloud/sample/SJRHB000026_X1">https://cstn.stjude.cloud/sample/SJRHB000026_X1</a> |
| SJRHB011_X     |     | Rec, Primary | Infratemporal fossa | PIK3CA, TP53, CDKN2A, LRP1B, SYNE1, FGFR4, CACNA1H, MUC16, HGF | No  | <a href="https://cstn.stjude.cloud/sample/SJRHB011_X">https://cstn.stjude.cloud/sample/SJRHB011_X</a>         |
| SJRHB013758_X1 |     | Primary      | Abdomen             | HRAS, TP53                                                     | No  | <a href="https://cstn.stjude.cloud/sample/SJRHB013758_X1">https://cstn.stjude.cloud/sample/SJRHB013758_X1</a> |

PDX: Patient derived xenograft, Dx: Diagnosis, Tx: Therapy, OS: Osteosarcoma, EWS: Ewing Sarcoma, RMS: Rhabdomyosarcoma, Rec: Recurrent, Met: Metastatic, NR: not reported.
