# Supplementary material for: IL-18R supported CAR T cells targeting oncofetal tenascin C for the immunotherapy of pediatric sarcoma and brain tumors
Source: PubMed Central journal article supplement — J Immunother Cancer. 2024 Nov 20;12(11):e009743. doi: 10.1136/jitc-2024-009743 (PMC11580246; doi:10.1136/jitc-2024-009743), 2024-11-20
Supplement: jitc-12-11-s003.pdf [file jitc-12-11-s003.pdf]

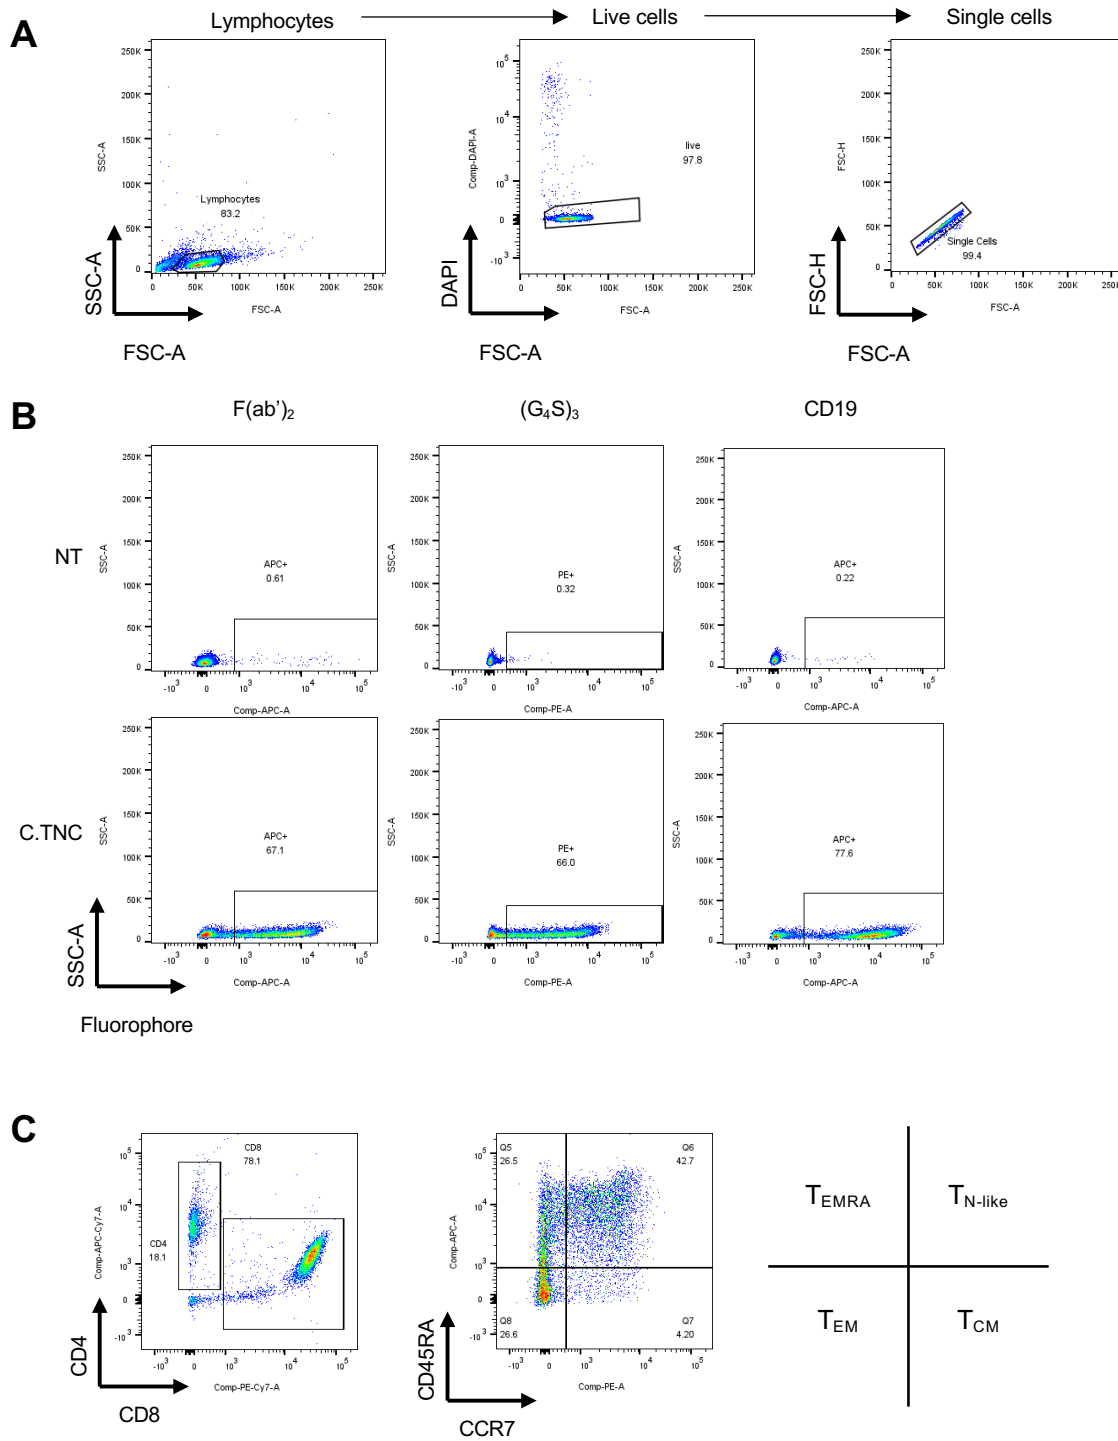

**SFig 1. Representative transduction and phenotype flow cytometry gating strategy.** (A) Gating for live, singlet T cells. (B) CAR-positive T cell populations based on F(ab')<sub>2</sub>, G<sub>4</sub>S, and CD19 staining. Top, NT cells; bottom, C.TNC-CAR T cells. (C) Representative phenotype gates.

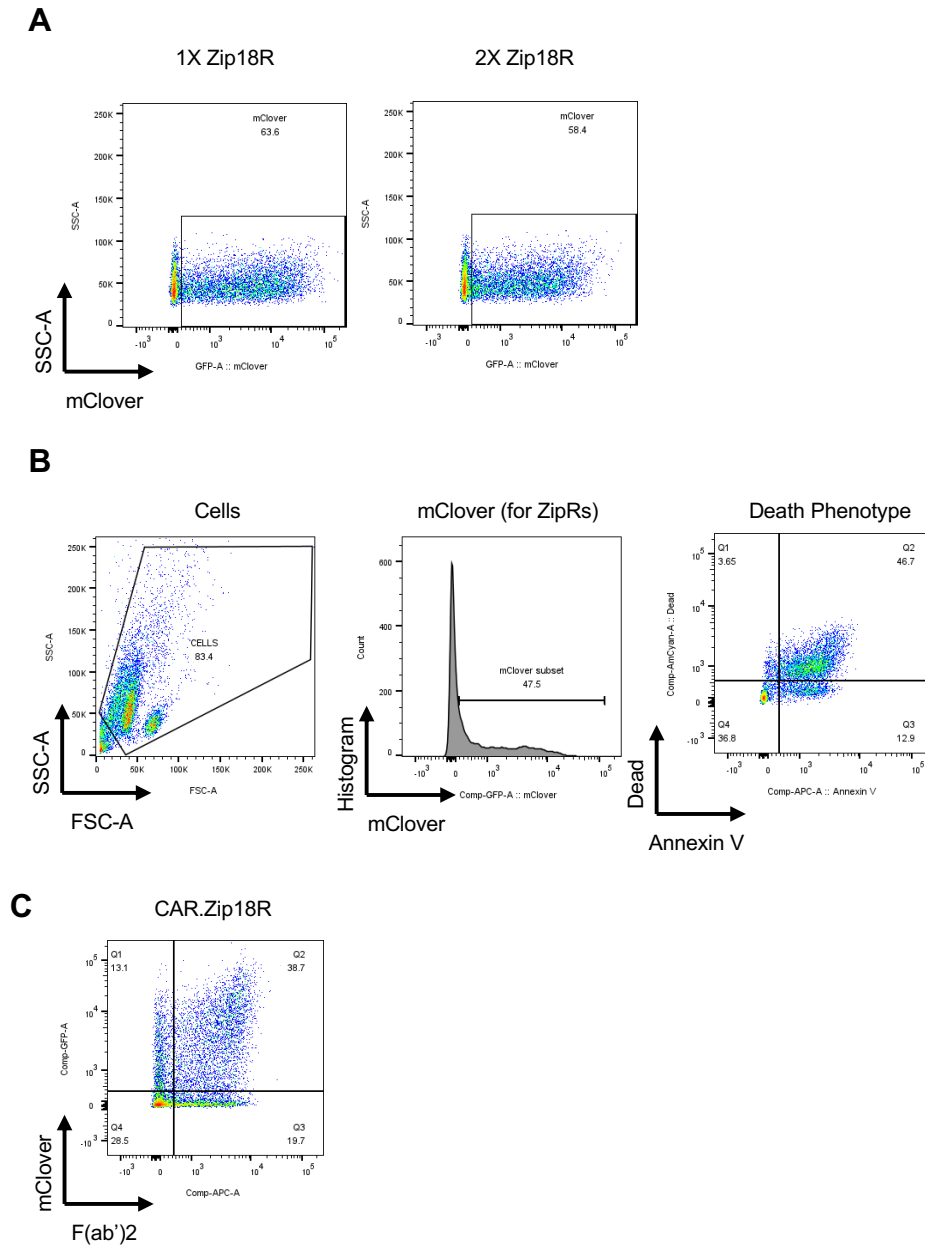

**SFig 2. Flow cytometric gating strategy to detect CAR.Zip18R T cells.** (A) CAR and mClover transduction representative gating starting from live, singlet T cells. (B) Apoptosis assay gates. mClover gate only used for ZipR constructs. Dead+, Annexin V+: dead; Dead -, Annexin V+: apoptotic; Dead+, Annexin V-: necrotic; Dead-, Annexin V-: live. (C) CAR and Zip18R transduction representative gating from live, single cells.

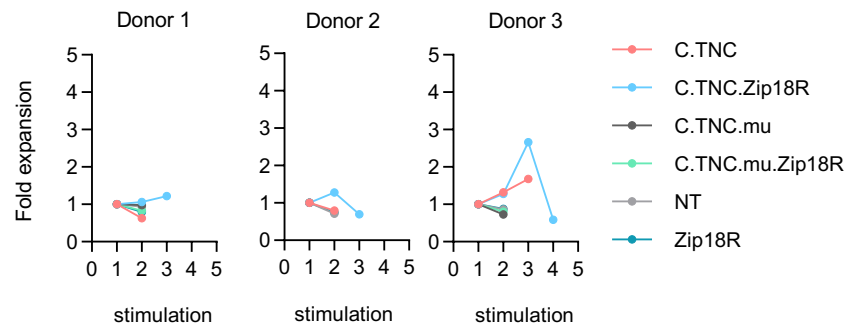

**SFig 3. Repeat stimulation assay with C.TNC-CAR T cell populations.** T cells were stimulated with LM7.GFP.ffLuc at an E:T ratio of 2:1 (for scheme, see Figure 4B). Each graph represents one donor.

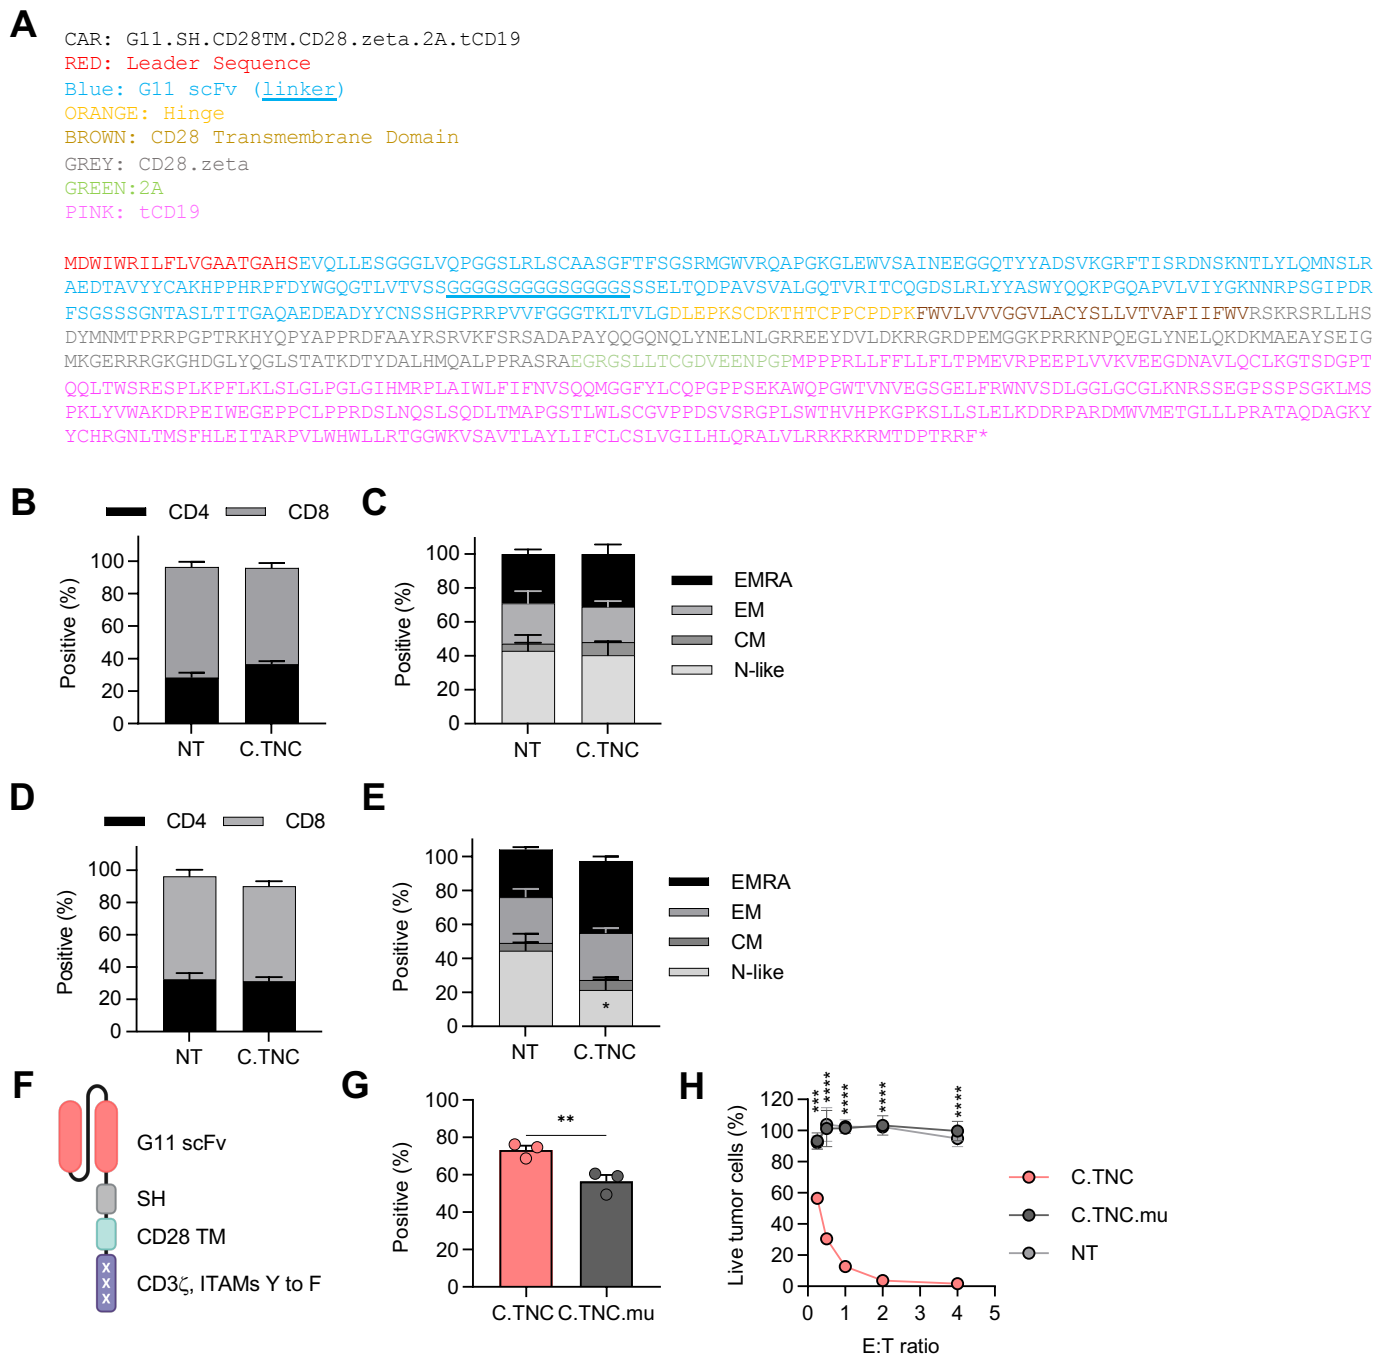

**SFig 4. Characterization of C.TNC-CAR T cells *in vitro*.** (A) Amino acid sequence of C.TNC-CAR. (B) CD4 and CD8 ratio and (C) phenotype (determined by CCR7 and CD45RA) measured by flow cytometry (mean + SEM, n=3). (D) CD4 and CD8 ratio and (E) phenotype after 48 hr coculture with LM7.GL cells measured by flow cytometry (mean + SEM, n=3), 2-way ANOVA, \*:p<0.05. (F) C.TNC.mu-CAR scheme. Y to F substitutions in ITAMS highlighted. (G) T cell transduction of C.TNC.mu detected by F(ab')<sub>2</sub> staining 7 days post-transduction (n=3, mean + SEM), Paired T-test, \*\*:p<0.01. (H) 72-hour luciferase cytotoxicity assay with C.TNC-CAR T cells diluted with NT T cells to match TDX efficiencies (n=3, mean + SEM), 2-way ANOVA, \*\*\*:p<0.001, \*\*\*\*:p<0.0001.



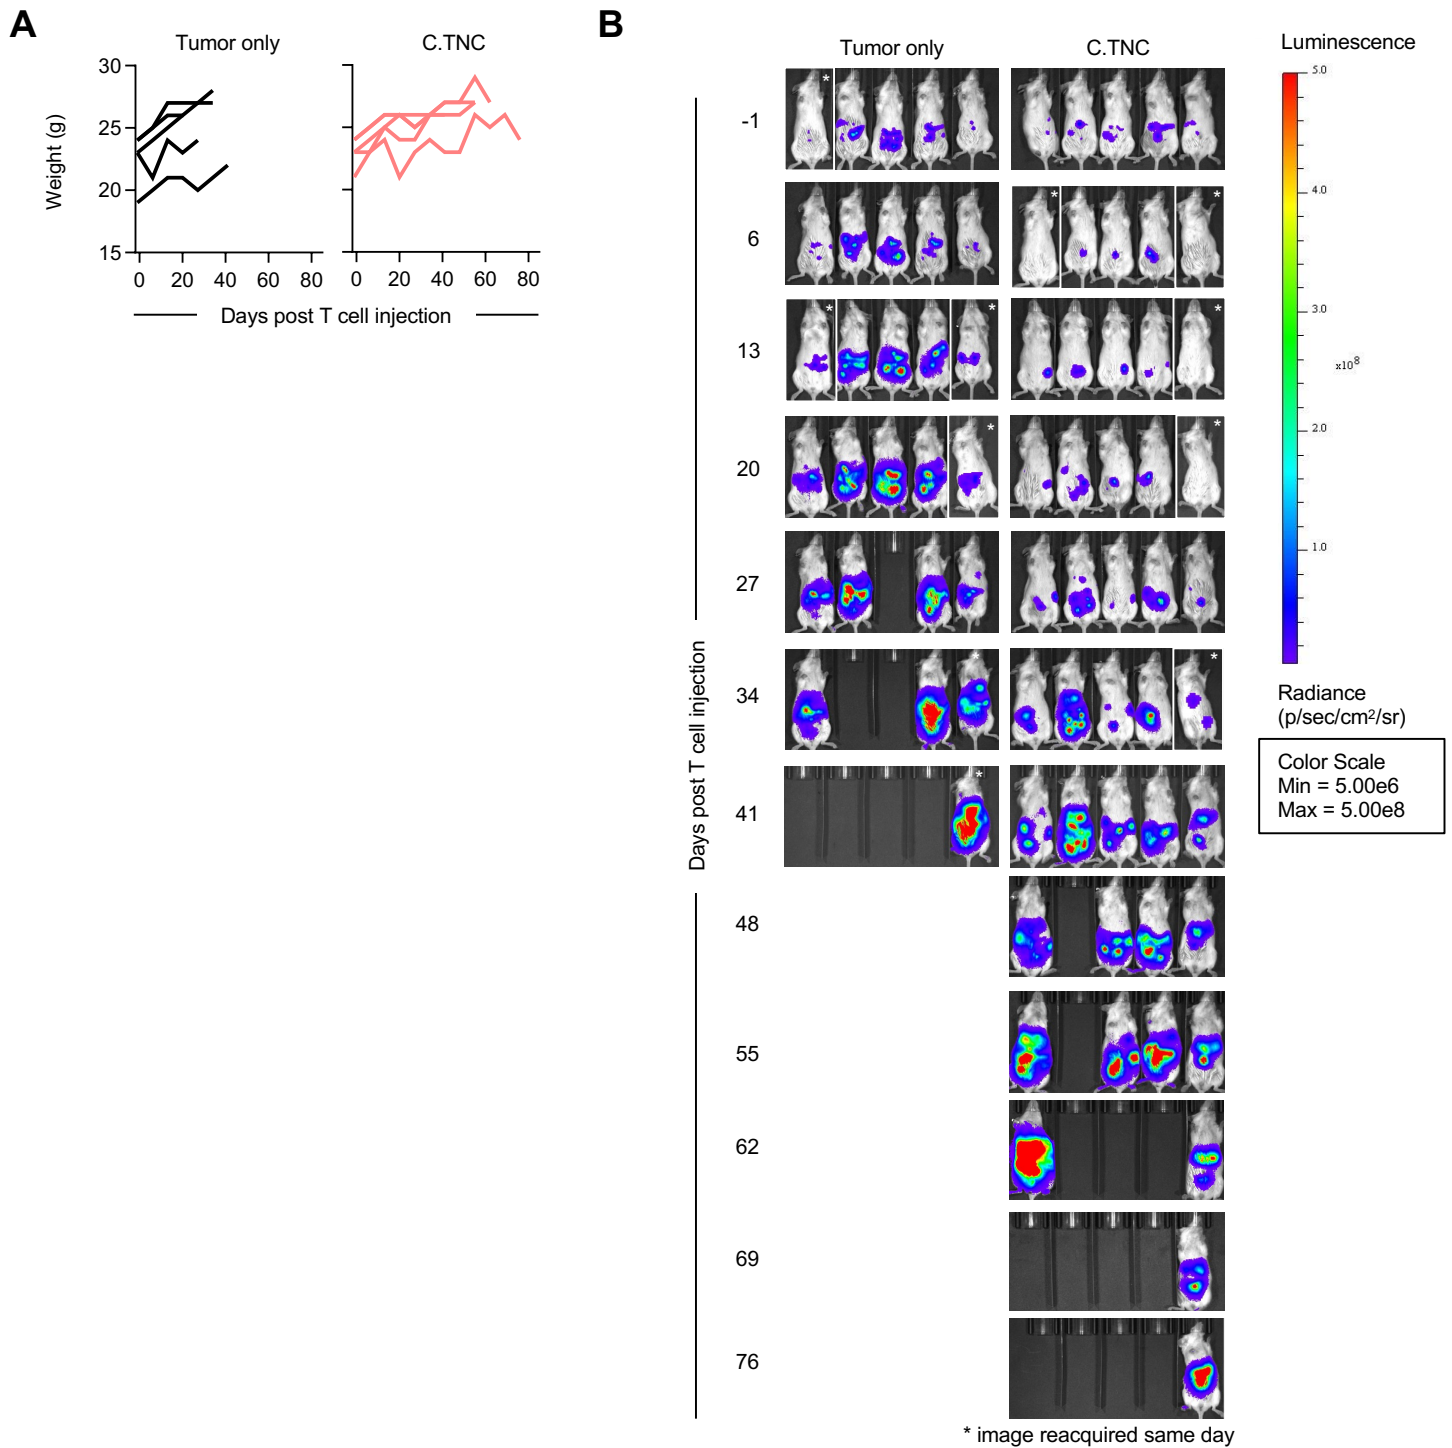

**SFig 5. Weight of mice and bioluminescence images for animal experiment shown in Figure 2H-J. (A)** Weights for each cohort measured weekly (n=5 per cohort). **(B)** Bioluminescence images of mice.

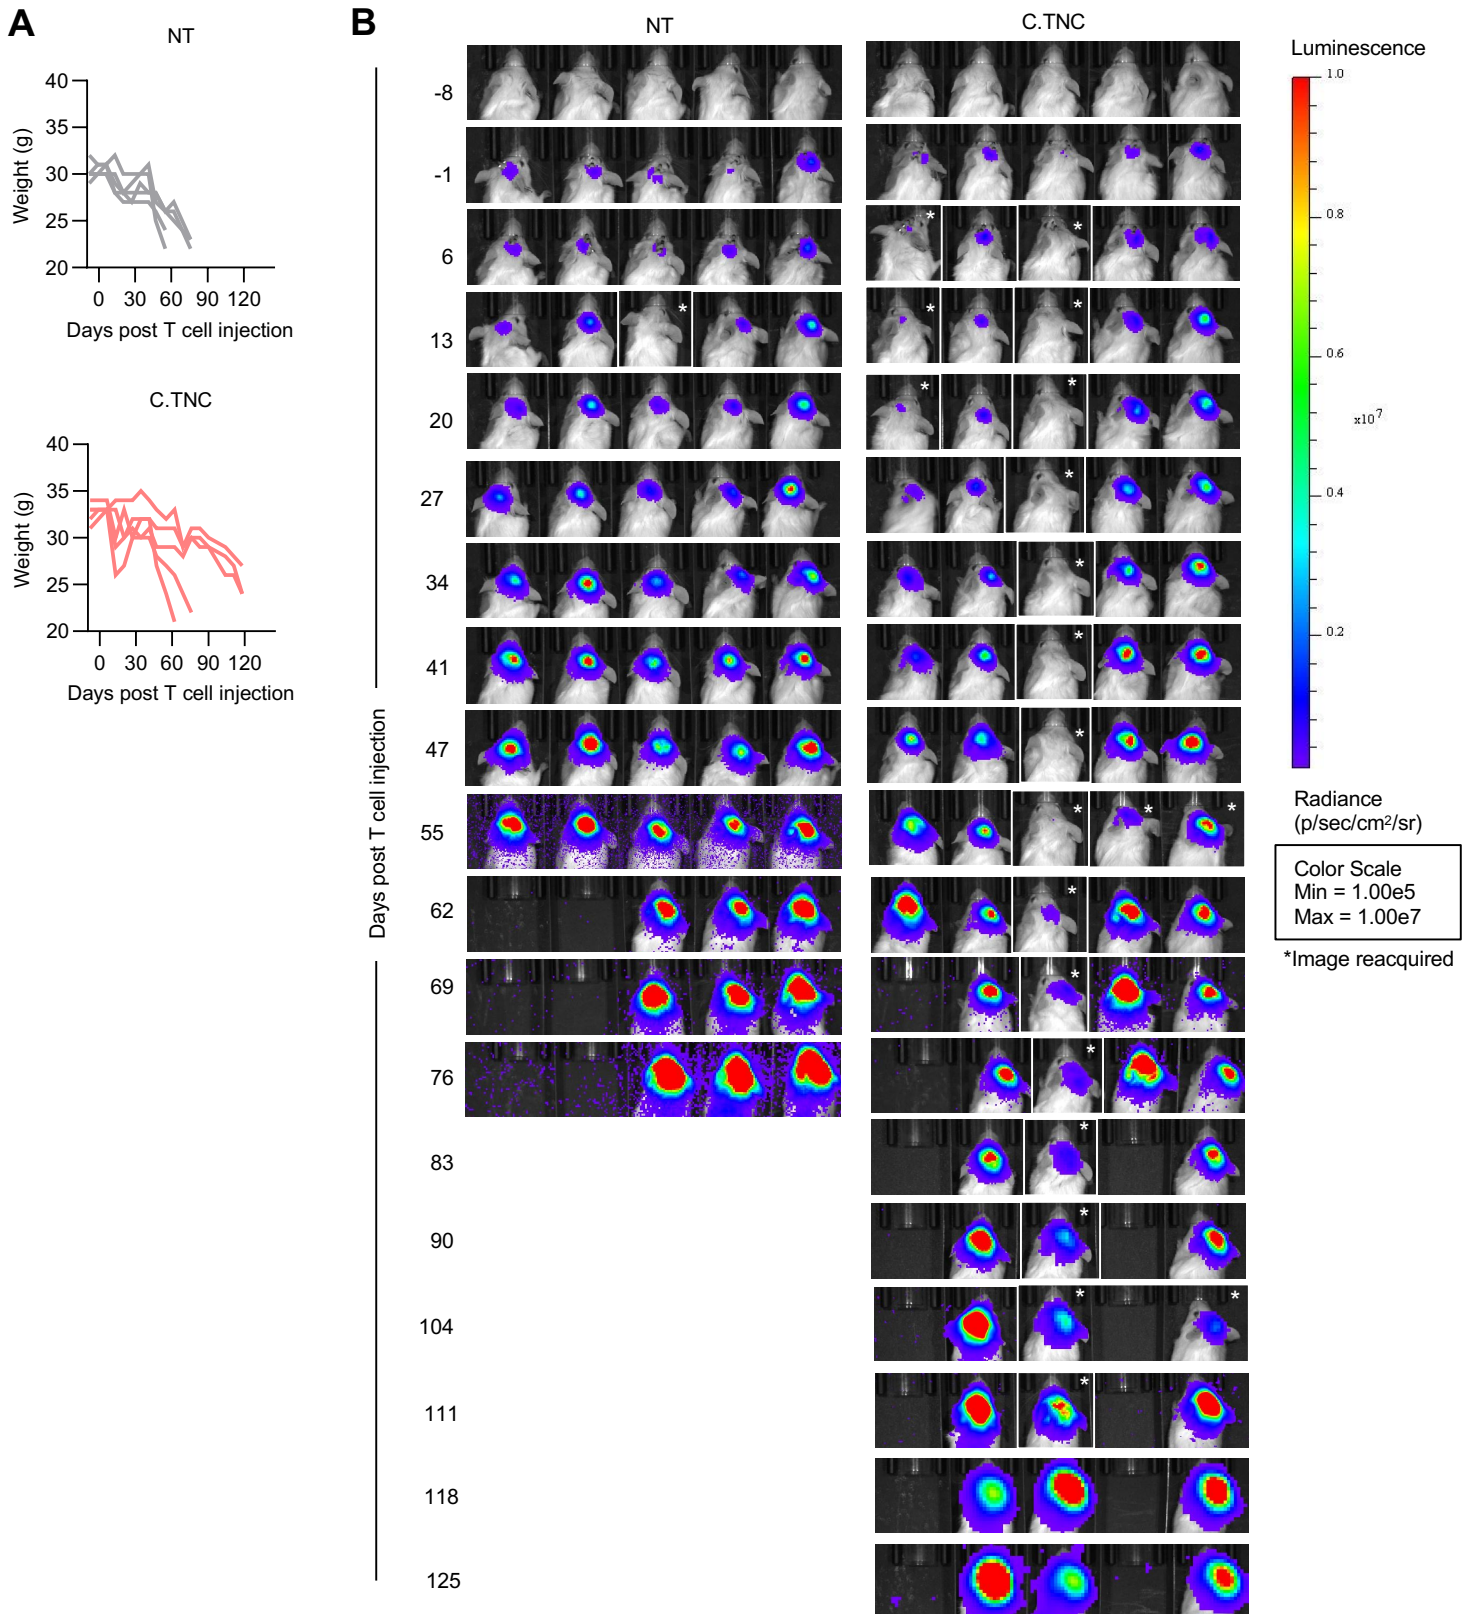

**SFig 6. Weight of mice and bioluminescence images for animal experiment shown in Figure 2K-M. (A) Weights for each cohort measured weekly (n=5 per cohort). (B) Bioluminescence images of mice.**



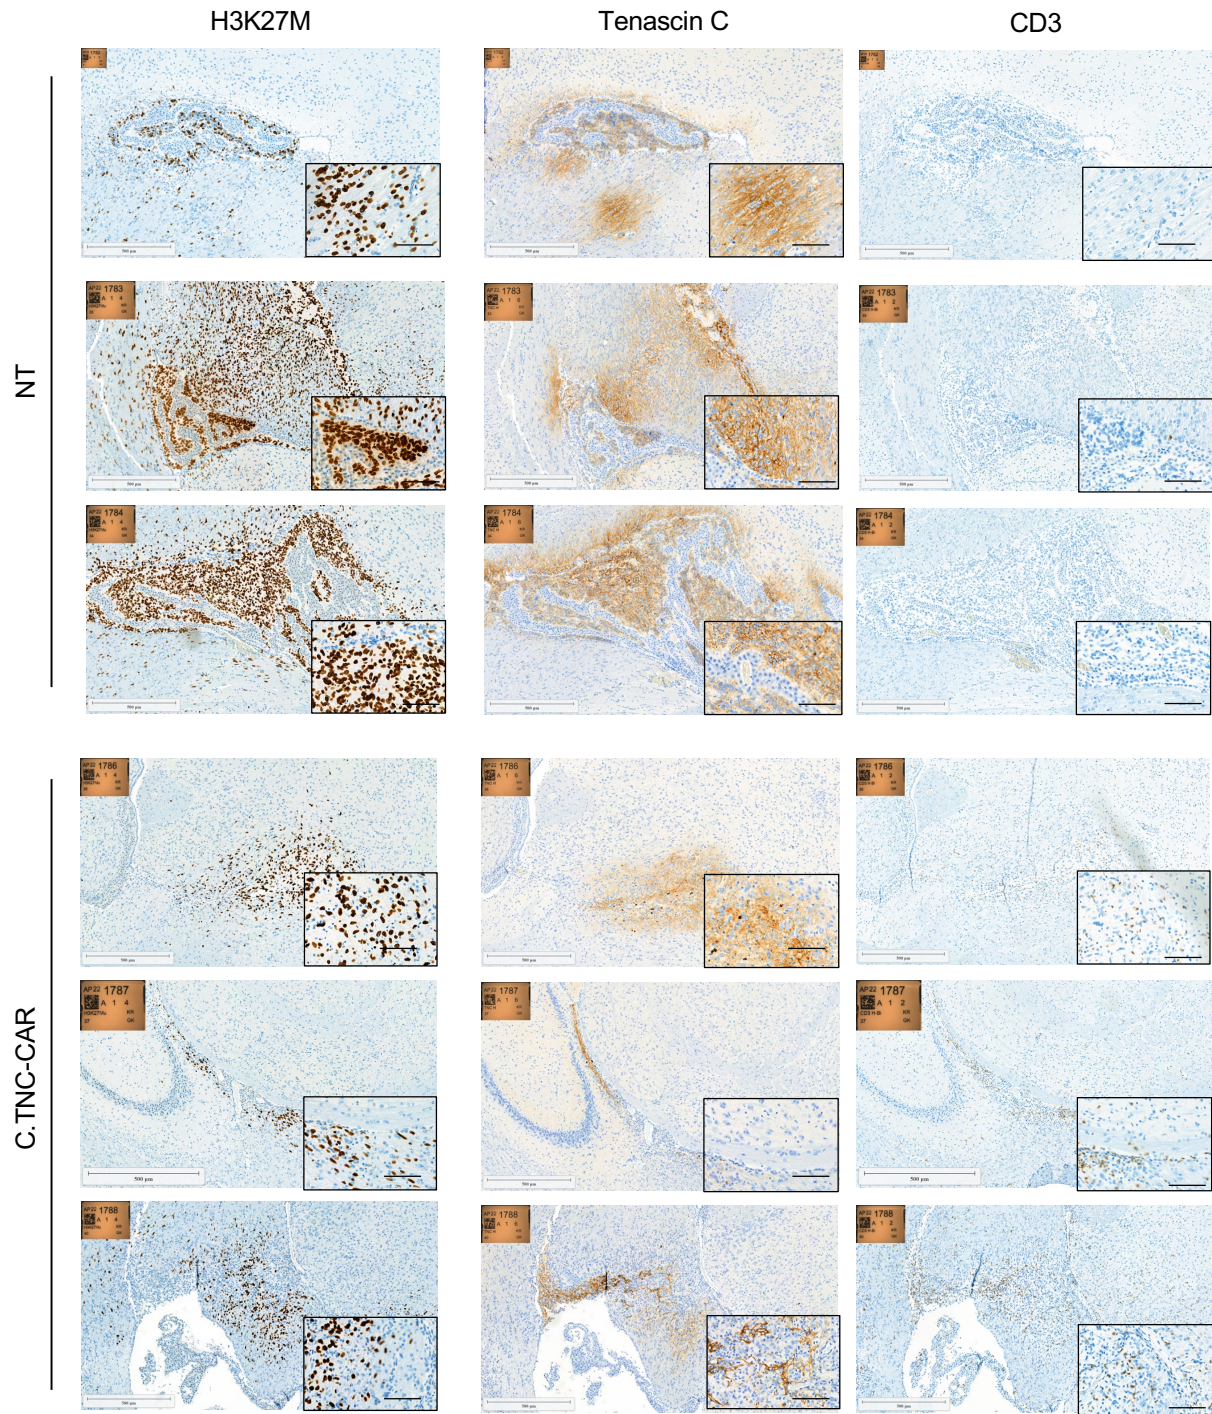

**SFig 7. DIPG007 IHC post CAR T cell therapy.**  $1 \times 10^6$  DIPG.YFP.flLuc cells were injected intracranially (i.c.), followed by  $2 \times 10^6$  T cells injected i.c. 7 days later in 10–12-week-old male NSG mice. Tumors were harvested after 2 weeks post T cell treatment. IHC for H3K27M, Tenascin C, and CD3 was done. Images from 3 tumors (mice) is shown. Low magnification: 500  $\mu$ m scale bar. High magnification: 100  $\mu$ m scale bar.

**A**

| Construct  | V <sub>H</sub> | Linker                          | V <sub>L</sub> | Hinge  | TM   | Costim. | ζ    |
|------------|----------------|---------------------------------|----------------|--------|------|---------|------|
| C.TNC      | G11            | (G <sub>4</sub> S) <sub>3</sub> | G11            | IgG1   | CD28 | CD28    | CD3ζ |
| C.TNC-SL   | G11            | G <sub>4</sub> S                | G11            | IgG1   | CD28 | CD28    | CD3ζ |
| C.TNC-IgG4 | G11            | (G <sub>4</sub> S) <sub>3</sub> | G11            | mulgG4 | CD28 | CD28    | CD3ζ |
| C.TNC-CD8a | G11            | (G <sub>4</sub> S) <sub>3</sub> | G11            | CD8α   | CD8α | CD28    | CD3ζ |
| C.TNC-zeta | G11            | (G <sub>4</sub> S) <sub>3</sub> | G11            |        | CD3ζ |         | CD3ζ |

**B**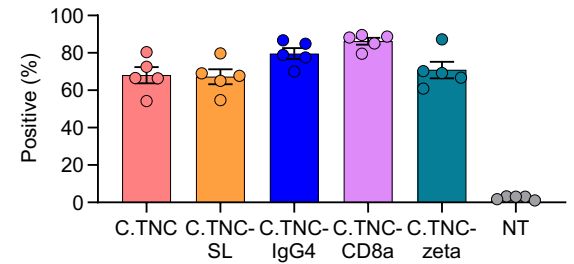**C**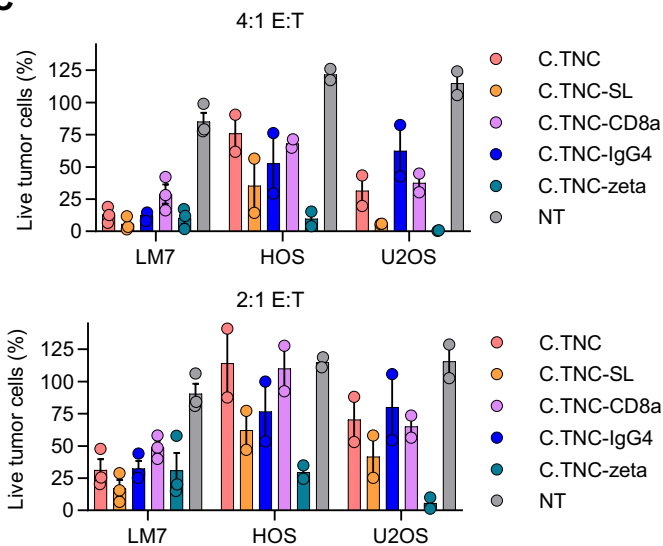**D**

| Condition  | LM7 |     | HOS |     | U2OS |     | SUM |
|------------|-----|-----|-----|-----|------|-----|-----|
|            | 2:1 | 4:1 | 2:1 | 4:1 | 2:1  | 4:1 |     |
| C.TNC-SL   | 1   | 1   | 1   | 1   | 1    | 1   | 6   |
| C.TNC-IgG4 | 0   | 0   | 1   | 1   | -1   | -1  | 0   |
| C.TNC-CD8a | -1  | -1  | 0   | 0   | 0    | 0   | -2  |
| C.TNC-zeta | 0   | 0   | 1   | 1   | 1    | 1   | 4   |

Percent tumor cells remaining above C.TNC: -1  
 Percent tumor cells remaining similar to C.TNC: 0  
 Percent tumor cells remaining below C.TNC: 1

**SFig 8. Influence of CAR design on cytolytic effector function of C.TNC-CAR T cells.** (A) Table of new C.TNC-CAR constructs. V<sub>H</sub>, variable heavy chain; V<sub>L</sub>, variable light chain; mulgG4, mutant IgG4; TM, transmembrane; Costim., costimulatory domain. (B) Transduction efficiency measured by percent F(ab')<sub>2</sub>-positive via flow cytometry on Day 7 post-transduction (n=5, mean + SEM). (C) Cytotoxicity after 24 hours at 4:1 and 2:1 E:T ratios as determined by a luciferase-based assay (n=2-3, mean + SEM). (D) Table summary of cytotoxicity results from C. Value -1 assigned if the average is above C.TNC, 0 if similar, and 1 if below. Sum calculated from each condition tested, those with positive values were used for *in vivo* studies.



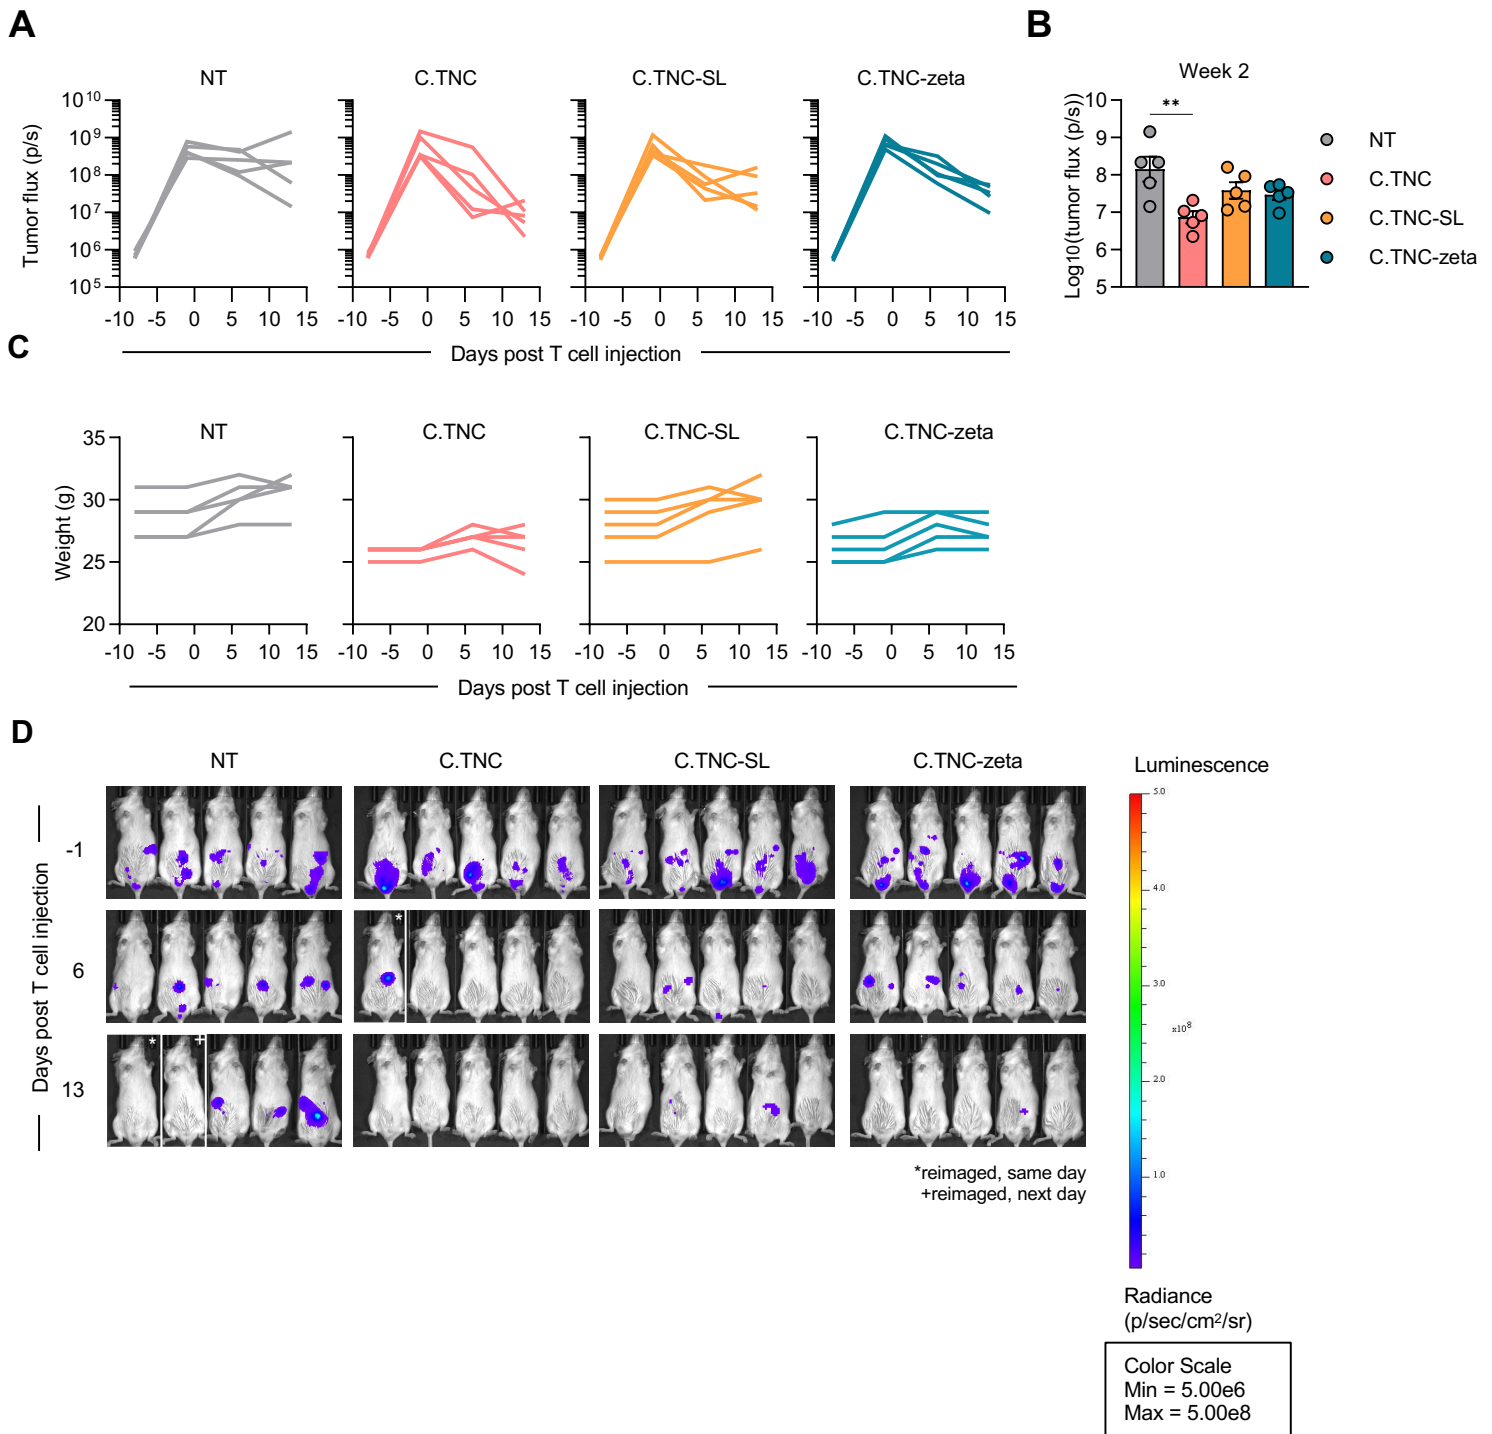

**SFig 9. Alternative C.TNC-CAR design does not improve antitumor activity of C.TNC-CAR T cells *in vivo*.** (A) Tumor flux values from LM7.GFP.ffLuc i.p. study in 5-6-week-old NSG male mice.  $1 \times 10^6$  LM7.GFP.ffLuc cells were injected i.p. and treated 7 days later with  $1 \times 10^6$ -CAR-positive T cells ( $n=5$  per cohort). (B) Day 13 post T cell injections log-transformed tumor flux values summarized from E (mean +SEM), One-way ANOVA,  $**p < 0.01$ . (C) Weights for each cohort measured weekly ( $n=5$  per cohort). (D) Images of mice.

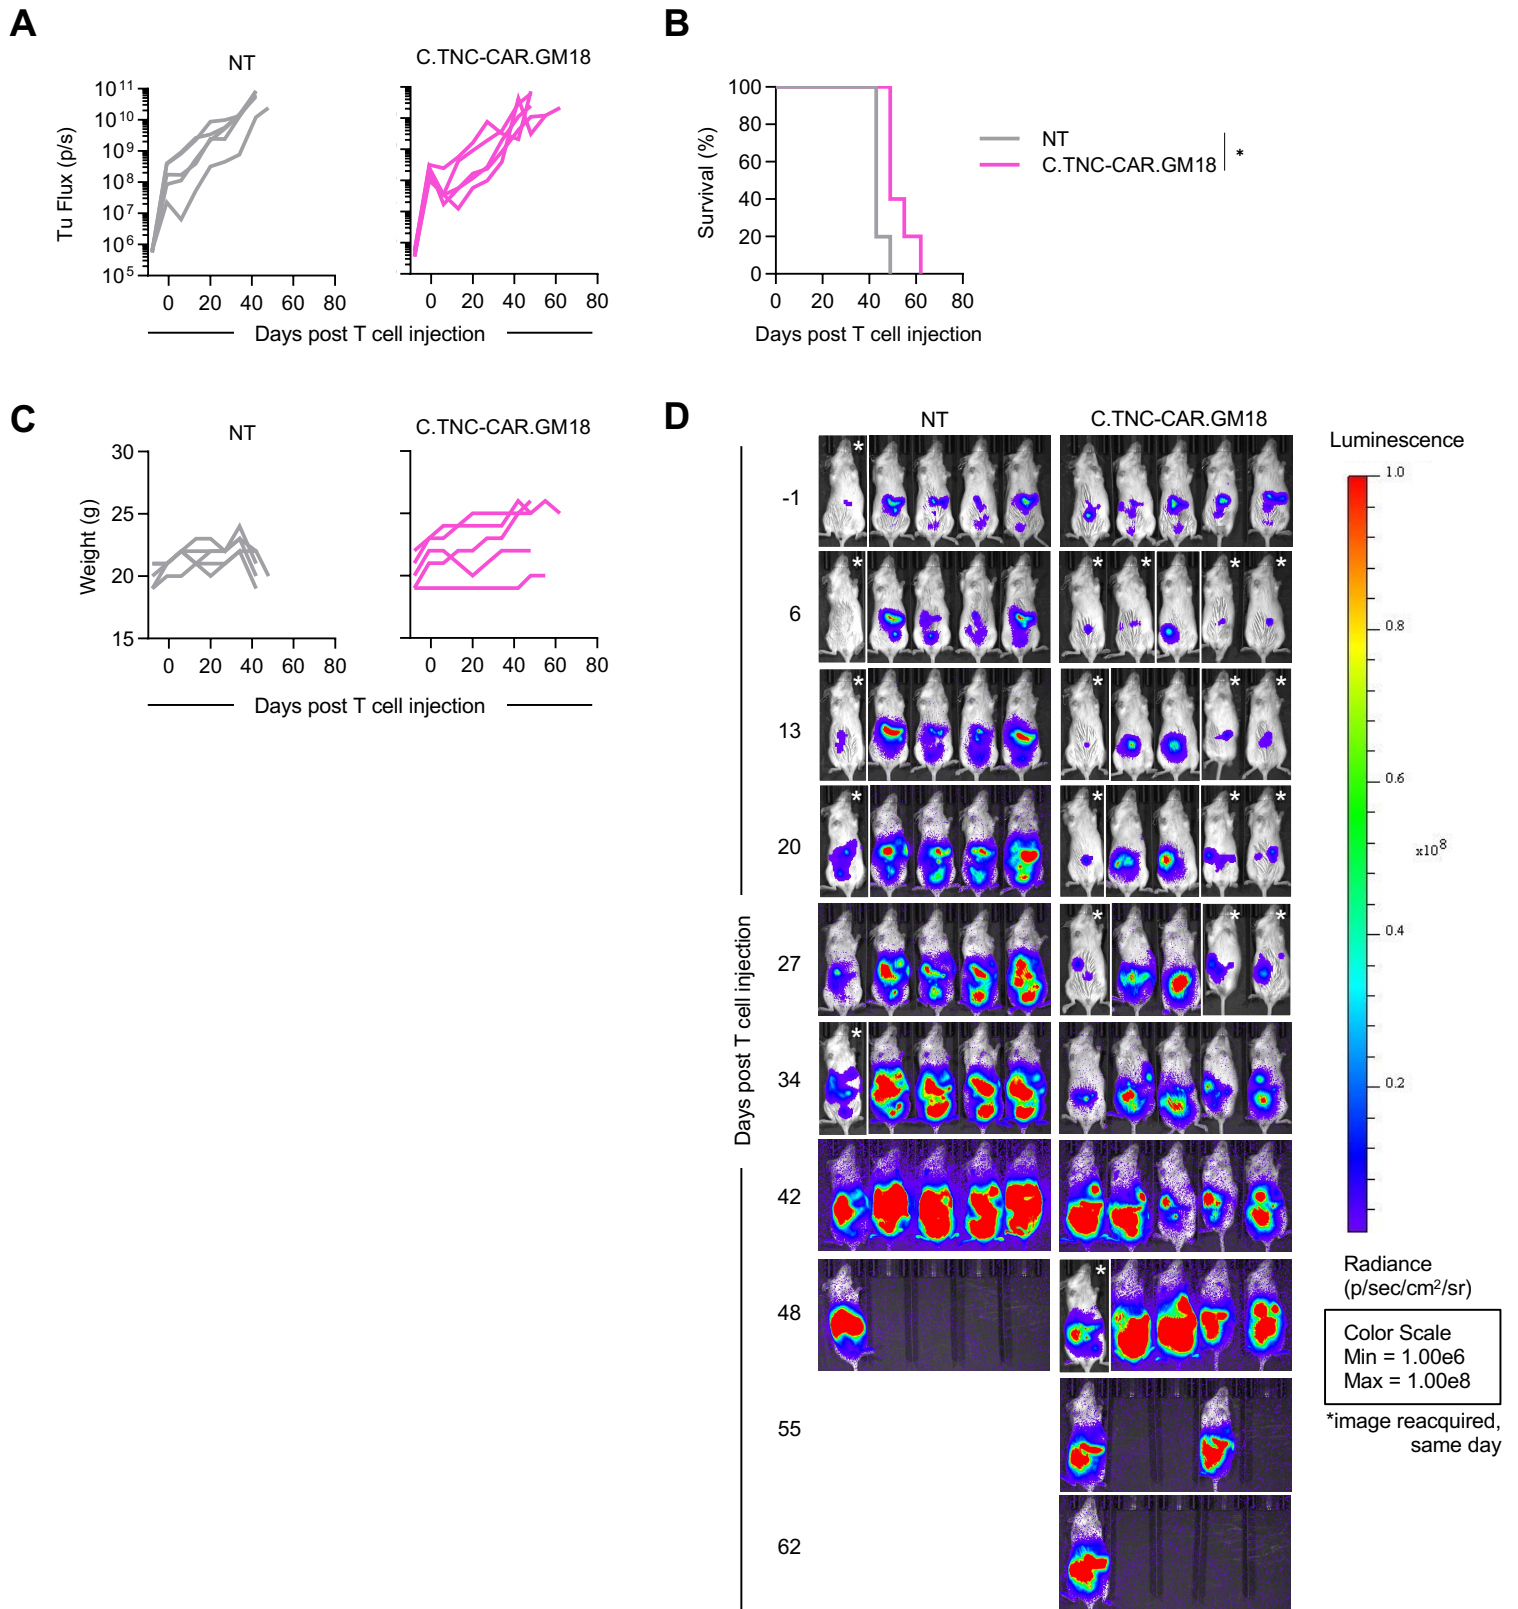

**SFig 10. Inducible GM18 does not improve antitumor activity of C.TNC-CAR T cells *in vivo*.**  $1 \times 10^6$  LM7.GFP.ffLuc cells were injected intraperitoneally (i.p.), followed by  $1 \times 10^6$  sorted T cells injected i.p. 7 days later in 5–6-week-old female NSG mice. **(A)** Tumor flux values (n=5 per cohort). **(B)** Kaplan-Meier survival curve, Mantel-Cox, \*:p<0.05. **(C)** Weights measured weekly. **(D)** Mouse images.
