# Supplementary material for: IL-18R supported CAR T cells targeting oncofetal tenascin C for the immunotherapy of pediatric sarcoma and brain tumors
Source: PubMed Central journal article supplement — J Immunother Cancer. 2024 Nov 20;12(11):e009743. doi: 10.1136/jitc-2024-009743 (PMC11580246; doi:10.1136/jitc-2024-009743), 2024-11-20
Supplement: jitc-12-11-s004.pdf [file jitc-12-11-s004.pdf]

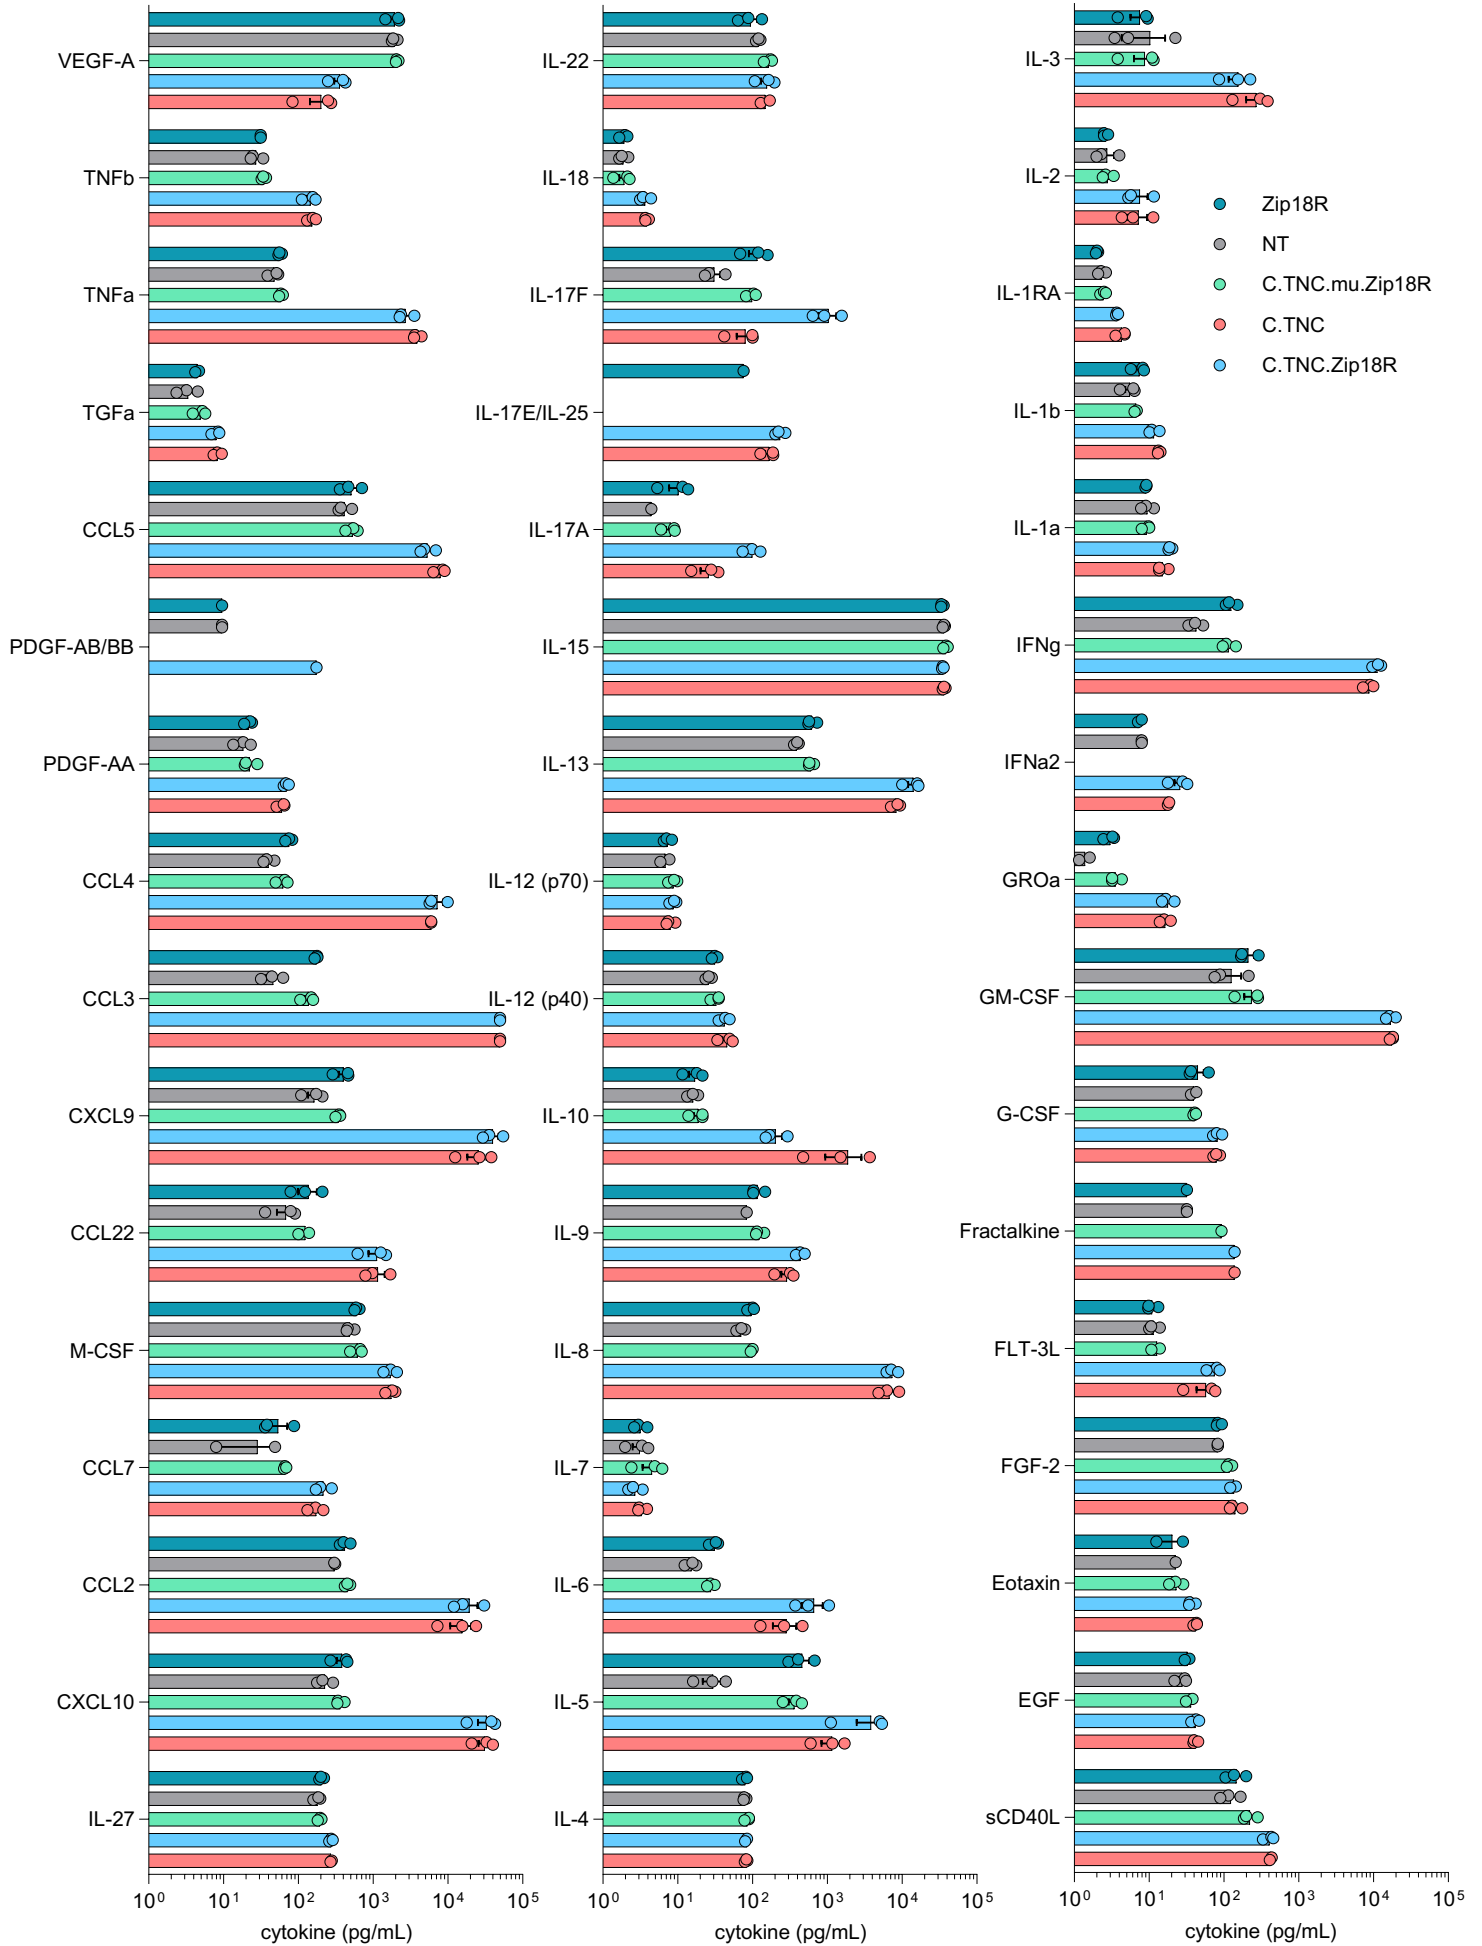

**SFig 11. Influence of Zip18R expression in CAR T cells on cytokines, chemokines, and growth factor production post tumor cell stimulation.** Extended data set for experiment shown in Figure 4E-G. Cytokines, chemokines, and growth factors determined by 48-plex MILLIPLEX analysis 48 hours post stimulation. CCL-3 and CCL-4 values are capped at maximum assessable value for C.TNC and C.TNC.Zip18R (n=3, undetectable values not reported).

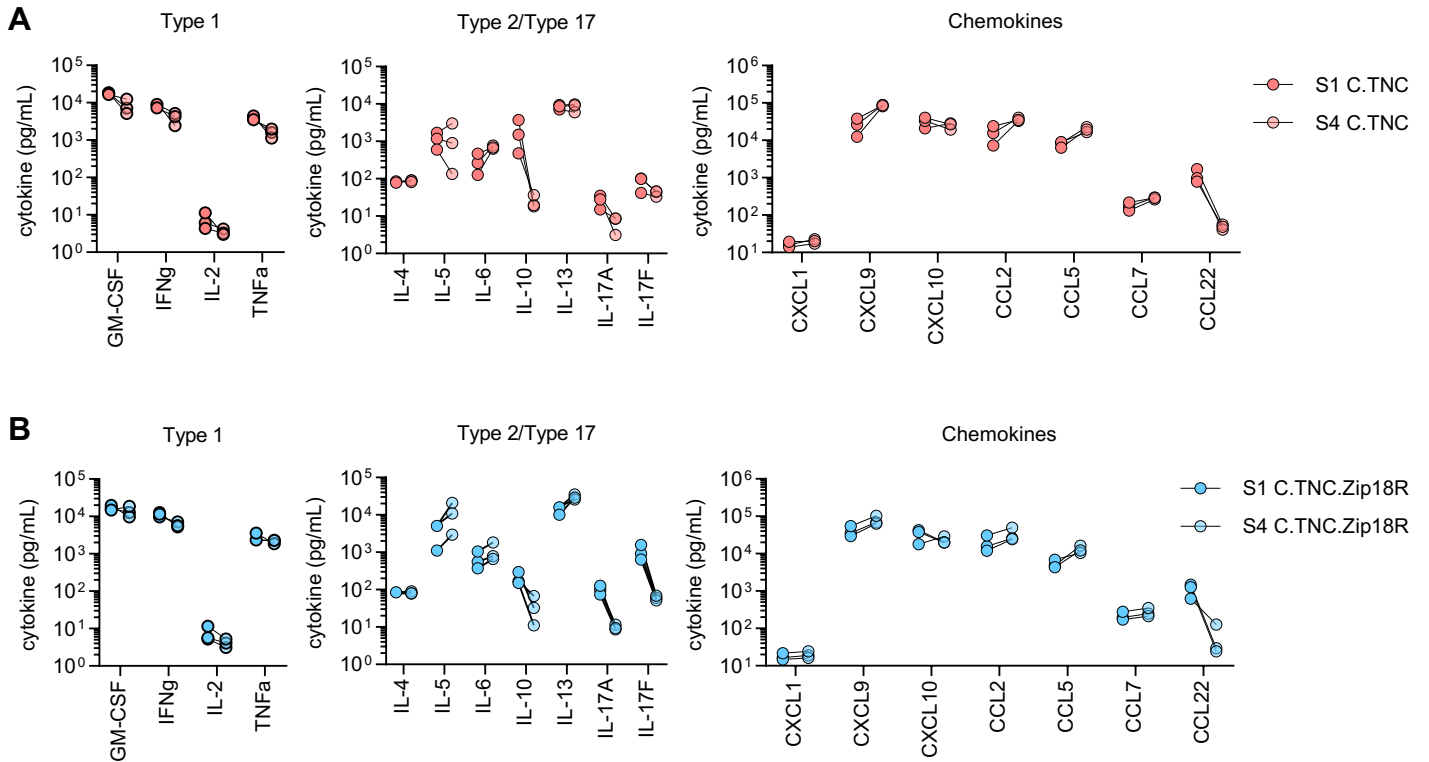

**SFig 12. Zip18R.C.TNC-CAR T cells maintain Type 1 effector cytokine production after 4th stimulation *in vitro*.** The summary data post 1st and 4th stimulation is shown in Figure 4H-J. Individual Type 1 cytokines, Type 2/Type 17 cytokines, and chemokines for (A) C.TNC-CAR and (B) C.TNC-CAR.Zip18R T cells. S1: 1st stimulation, S4: 4th stimulation.

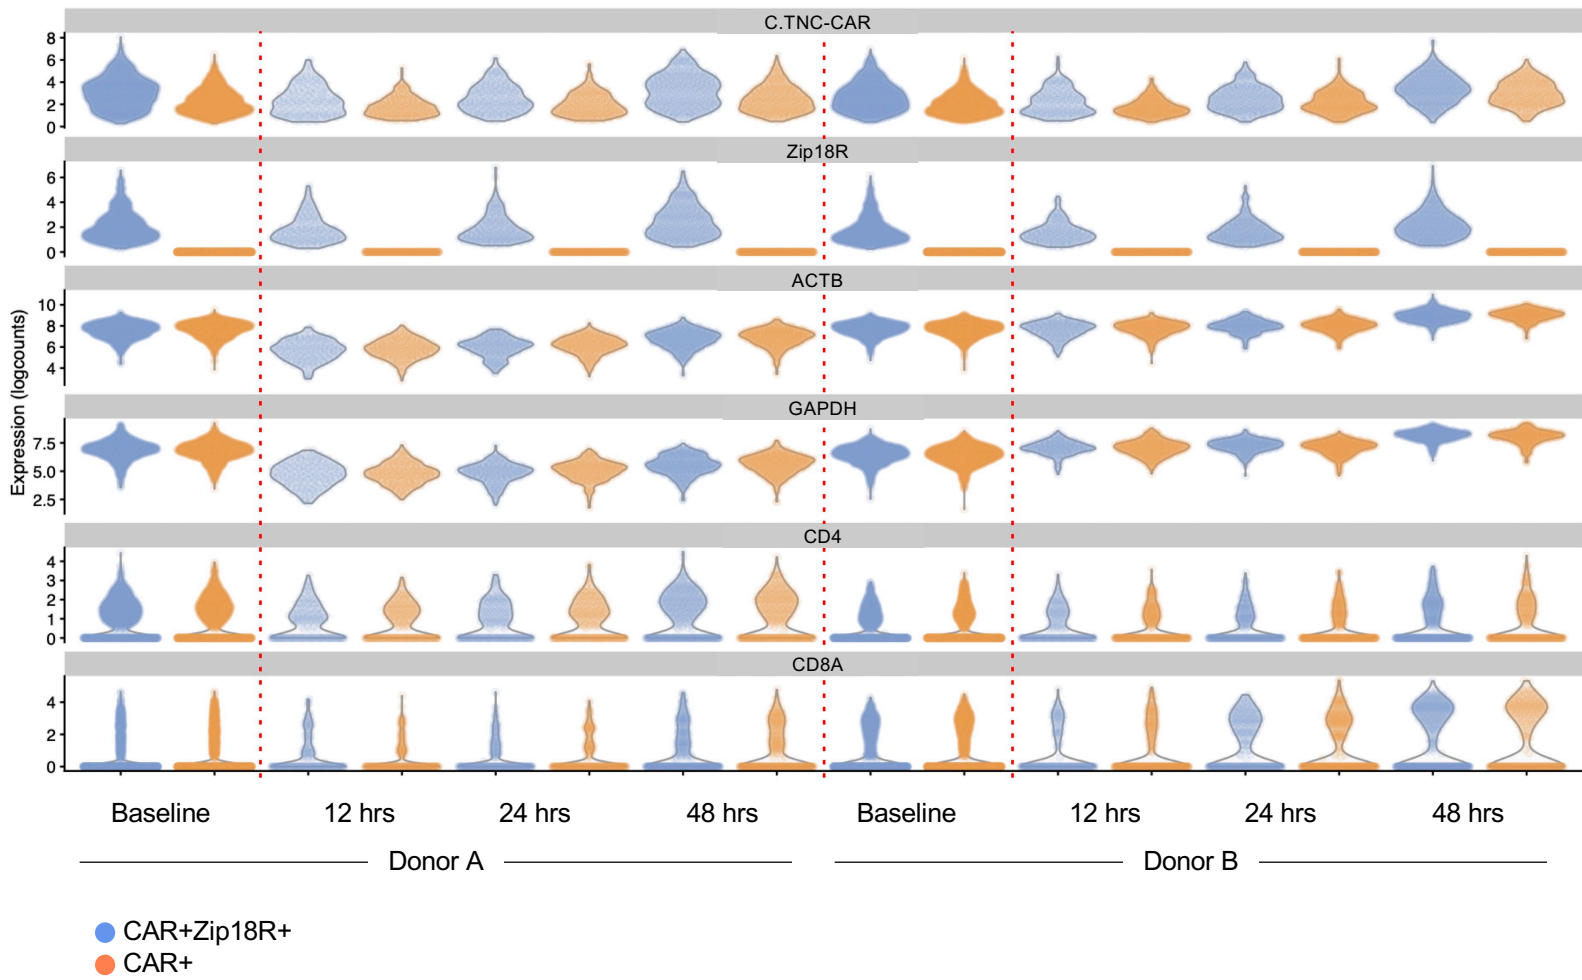

**SFig 13. Breakdown of transgene expression.** Gene expression in C.TNC-CAR.Zip18R and C.TNC-CAR populations for selected genes: C.TNC-CAR, Zip18R, housekeeping genes (ACTB, GAPDH), CD4, and CD8.



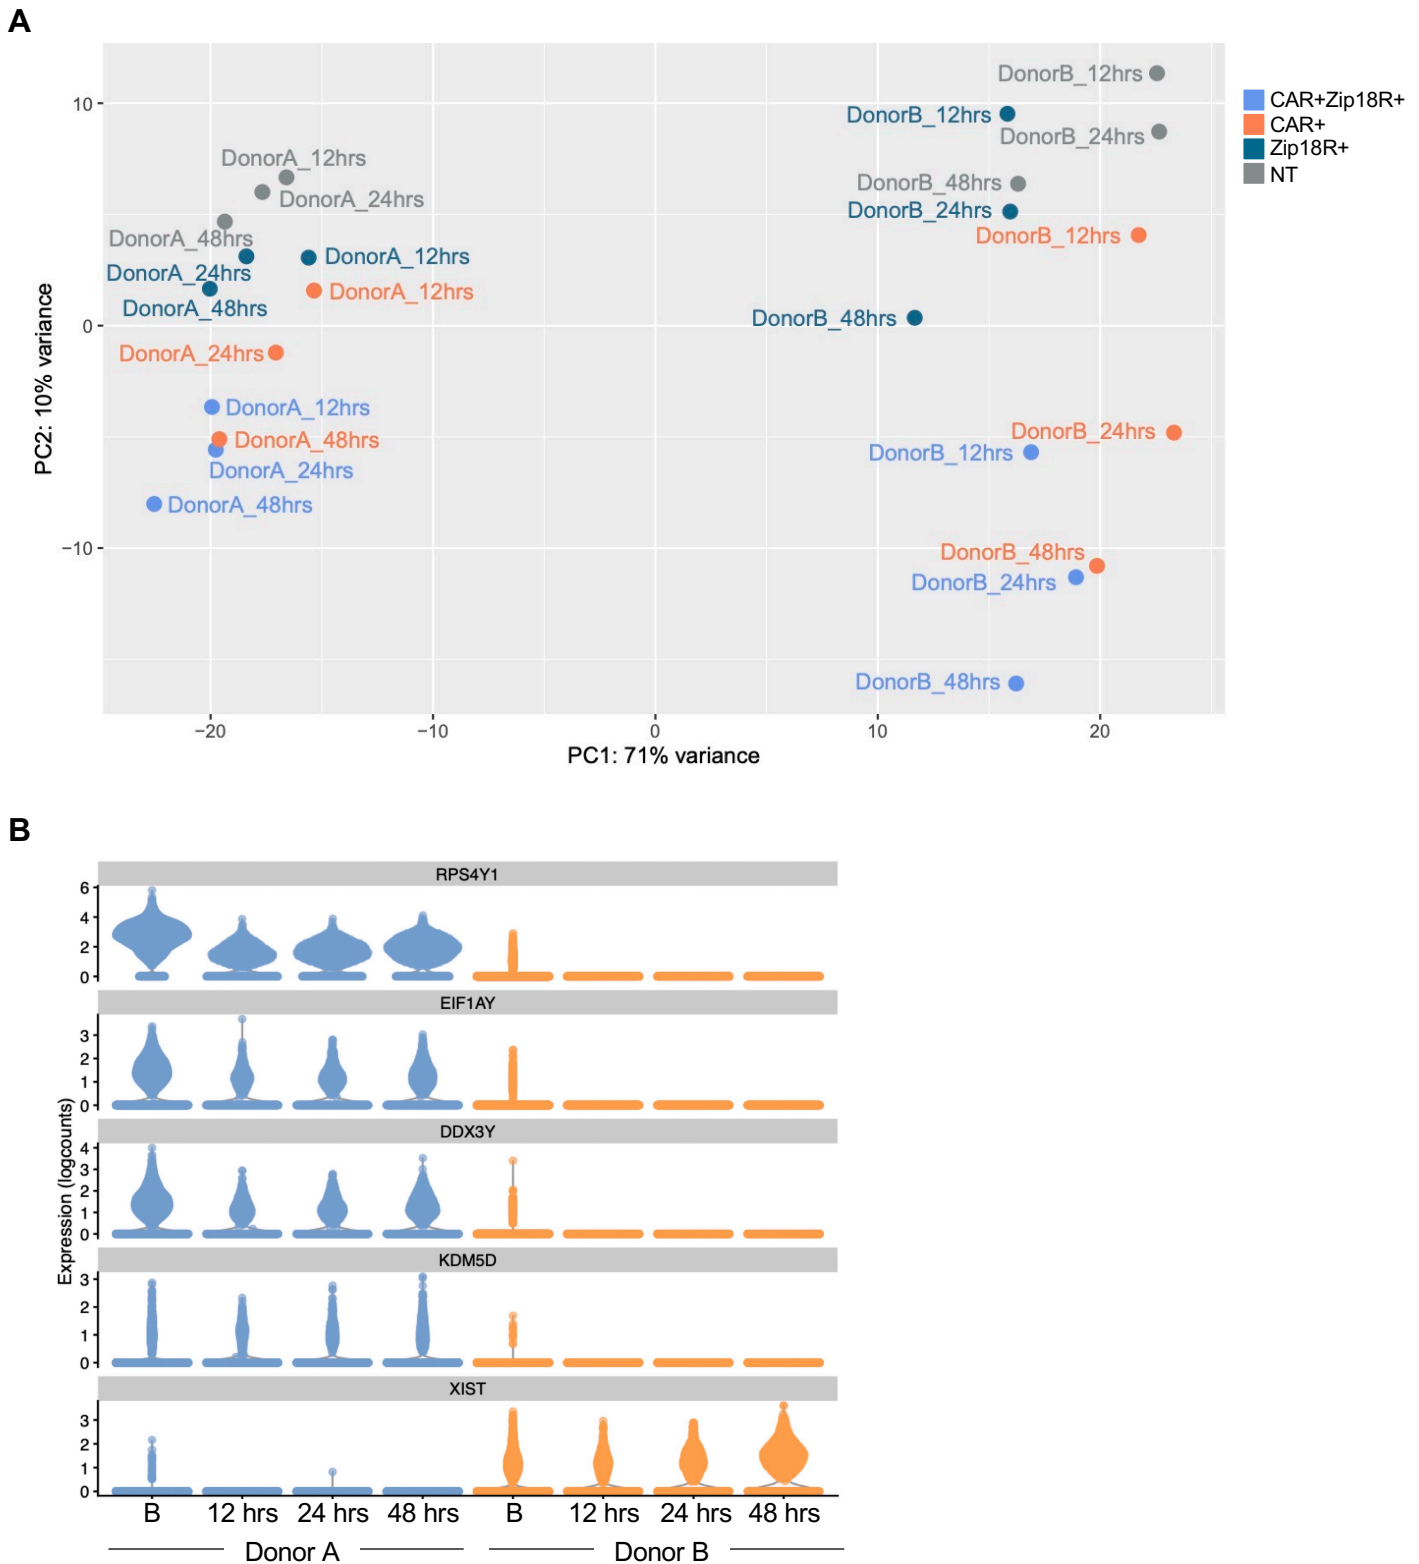

**SFig 14. Gender differences in donor selection.** (A) Principal component analysis of pseudo-bulk data of cell populations from scRNAseq data. (B) Gene expression in cell populations for gender-specific genes. B: baseline.

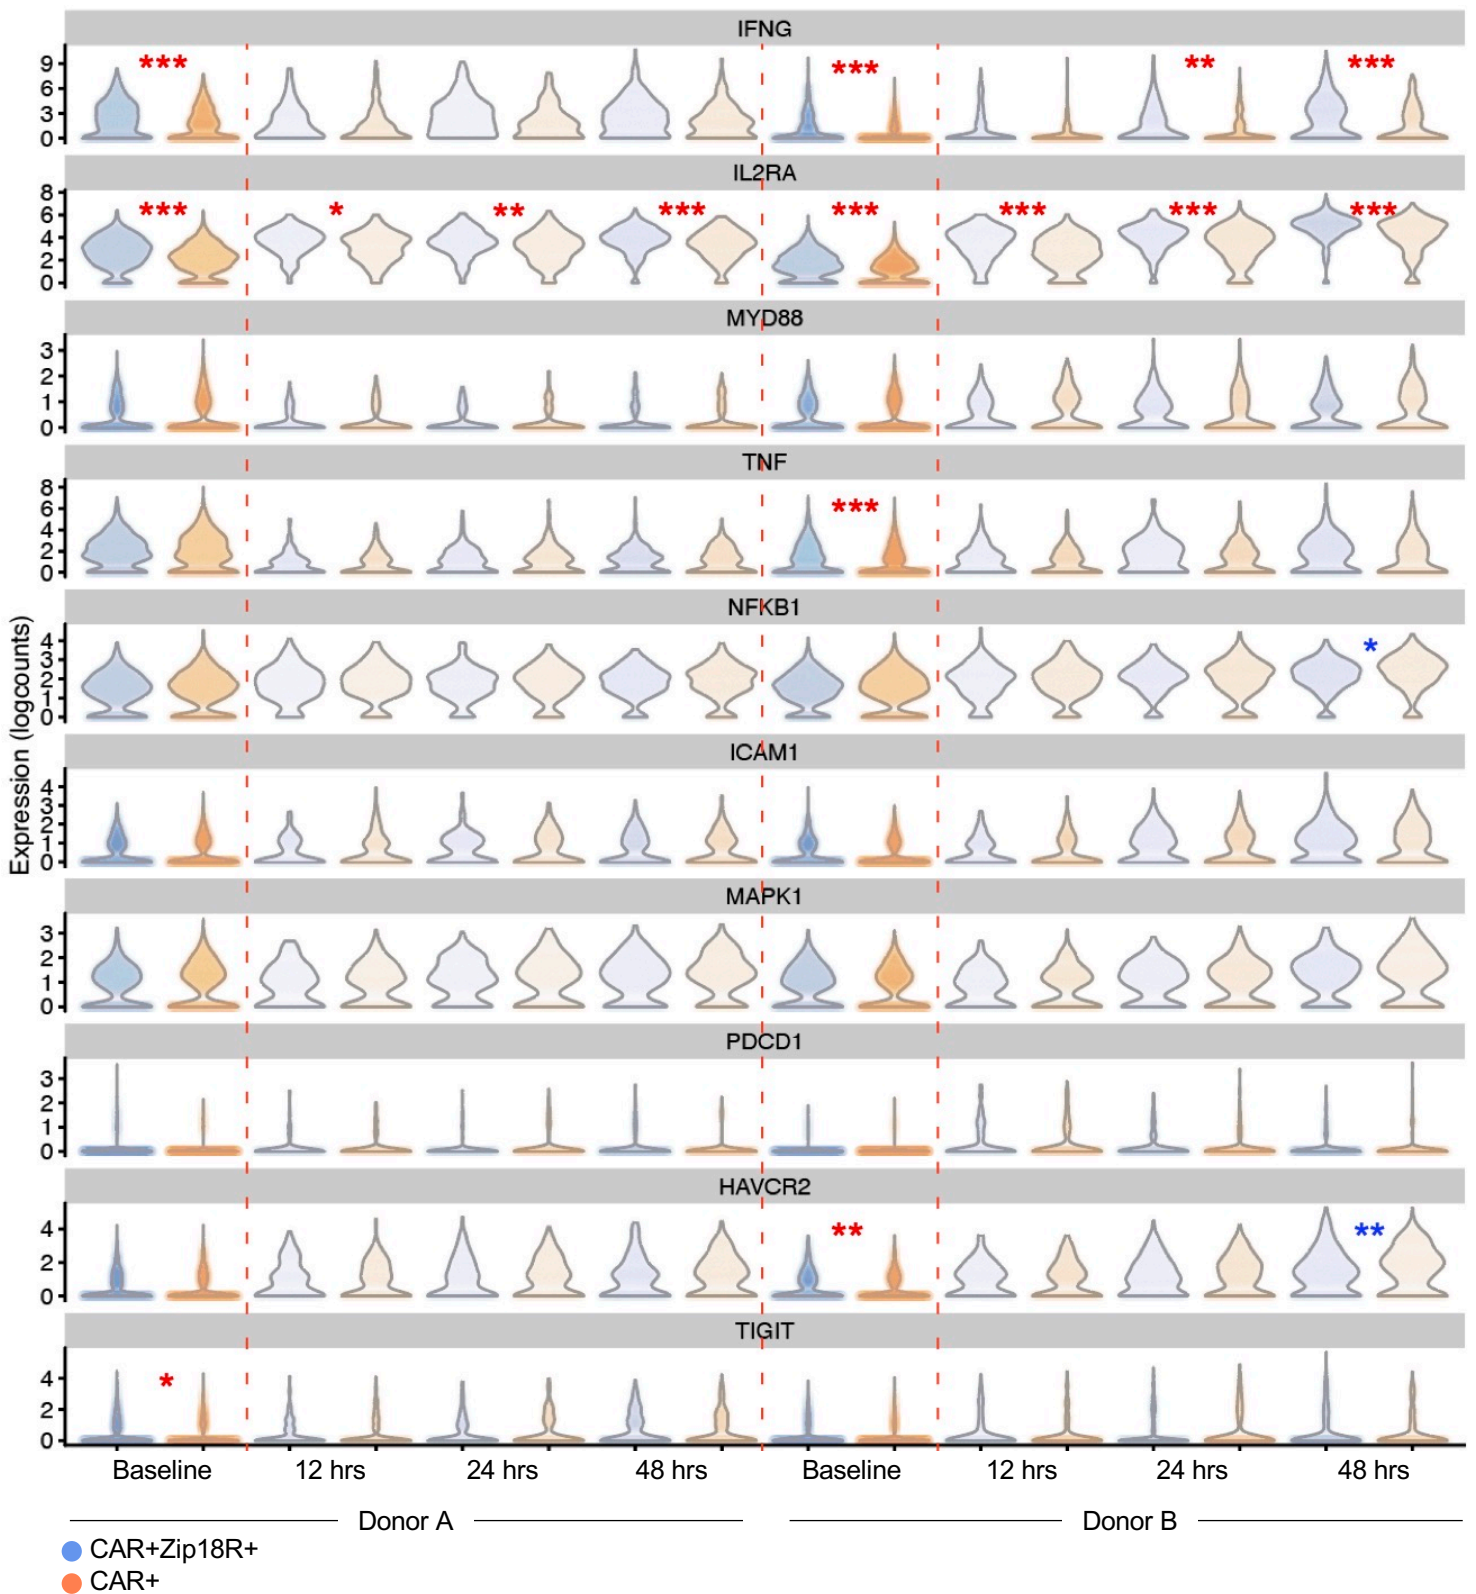

**SFig 15. Pathway specific gene expression analysis.** Gene expression in cell populations for selected genes involved in T cell activation, T cell exhaustion, and MyD88 signaling. Red asterisks are upregulated in CAR+Zip18R+ compared to CAR+Zip18R-. Blue asterisks are downregulated in CAR+Zip18R+ compared to CAR+Zip18R-. \*: adjusted p < 0.1; \*\*: adjusted p < 0.01; \*\*\*: adjusted p < 0.001.

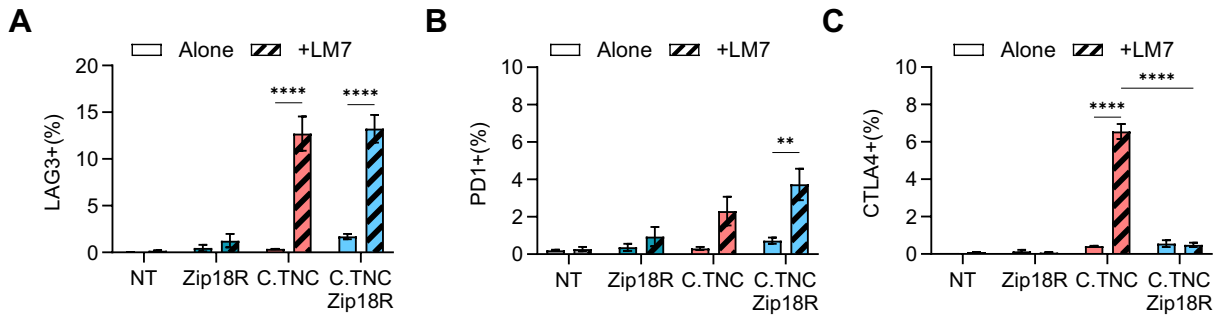

D

|                                          | CD28       | CD39         | CD69         | CTLA4        | LAG3         | PD1        | TIM3         |
|------------------------------------------|------------|--------------|--------------|--------------|--------------|------------|--------------|
| NT:Alone vs. NT:+LM7                     | ns >0.9999 | ns >0.9999   | ns >0.9999   | ns >0.9999   | ns >0.9999   | ns >0.9999 | ns 0.6854    |
| NT:Alone vs. Zip18R:Alone                | ns >0.9999 | * 0.0343     | ns 0.5708    | ns >0.9999   | ns >0.9999   | ns >0.9999 | ns 0.6676    |
| NT:Alone vs. Zip18R:+LM7                 | ns >0.9999 | * 0.0343     | ns 0.1516    | ns >0.9999   | ns 0.9702    | ns 0.9389  | *** 0.0003   |
| NT:Alone vs. C.TNC:Alone                 | ns 0.9963  | ns 0.1758    | ns 0.0898    | ns 0.7699    | ns >0.9999   | ns >0.9999 | ** 0.0059    |
| NT:Alone vs. C.TNC:+LM7                  | ** 0.0024  | **** <0.0001 | **** <0.0001 | **** <0.0001 | **** <0.0001 | ns 0.0719  | **** <0.0001 |
| NT:Alone vs. C.TNC.Zip18R:Alone          | ns >0.9999 | **** <0.0001 | ns 0.8955    | ns 0.4223    | ns 0.871     | ns 0.9908  | **** <0.0001 |
| NT:Alone vs. C.TNC.Zip18R:+LM7           | ns 0.5314  | **** <0.0001 | **** <0.0001 | ns 0.5702    | **** <0.0001 | ** 0.001   | **** <0.0001 |
| NT:+LM7 vs. Zip18R:Alone                 | ns >0.9999 | * 0.0123     | ns 0.6491    | ns >0.9999   | ns >0.9999   | ns >0.9999 | ns >0.9999   |
| NT:+LM7 vs. Zip18R:+LM7                  | ns >0.9999 | * 0.0123     | ns 0.1885    | ns >0.9999   | ns 0.984     | ns 0.9604  | ** 0.007     |
| NT:+LM7 vs. C.TNC:Alone                  | ns 0.9864  | ns 0.0657    | ns 0.0707    | ns 0.8594    | ns >0.9999   | ns >0.9999 | ns 0.1451    |
| NT:+LM7 vs. C.TNC:+LM7                   | ** 0.0018  | **** <0.0001 | **** <0.0001 | **** <0.0001 | **** <0.0001 | ns 0.0854  | **** <0.0001 |
| NT:+LM7 vs. C.TNC.Zip18R:Alone           | ns >0.9999 | **** <0.0001 | ns 0.8417    | ns 0.5269    | ns 0.9102    | ns 0.9956  | **** <0.0001 |
| NT:+LM7 vs. C.TNC.Zip18R:+LM7            | ns 0.4317  | **** <0.0001 | **** <0.0001 | ns 0.6803    | **** <0.0001 | ** 0.0012  | **** <0.0001 |
| Zip18R:Alone vs. Zip18R:+LM7             | ns >0.9999 | ns >0.9999   | ns 0.9762    | ns >0.9999   | ns 0.9977    | ns 0.9827  | ** 0.0074    |
| Zip18R:Alone vs. C.TNC:Alone             | ns 0.582   | ns >0.9999   | ** 0.0024    | ns 0.9306    | ns >0.9999   | ns >0.9999 | ns 0.1528    |
| Zip18R:Alone vs. C.TNC:+LM7              | *** 0.0004 | **** <0.0001 | **** <0.0001 | **** <0.0001 | **** <0.0001 | ns 0.1112  | **** <0.0001 |
| Zip18R:Alone vs. C.TNC.Zip18R:Alone      | ns 0.8915  | * 0.0485     | ns 0.0852    | ns 0.6456    | ns 0.9698    | ns 0.999   | **** <0.0001 |
| Zip18R:Alone vs. C.TNC.Zip18R:+LM7       | ns 0.0954  | **** <0.0001 | **** <0.0001 | ns 0.7909    | **** <0.0001 | ** 0.0016  | **** <0.0001 |
| Zip18R:+LM7 vs. C.TNC:Alone              | ns 0.9797  | ns >0.9999   | ** 0.0004    | ns 0.8209    | ns 0.9953    | ns 0.9694  | ns 0.7355    |
| Zip18R:+LM7 vs. C.TNC:+LM7               | ** 0.0016  | **** <0.0001 | **** <0.0001 | **** <0.0001 | **** <0.0001 | ns 0.4371  | **** <0.0001 |
| Zip18R:+LM7 vs. C.TNC.Zip18R:Alone       | ns 0.9999  | * 0.0485     | * 0.0142     | ns 0.4779    | ns >0.9999   | ns >0.9999 | ns 0.2063    |
| Zip18R:+LM7 vs. C.TNC.Zip18R:+LM7        | ns 0.3974  | **** <0.0001 | **** <0.0001 | ns 0.6302    | **** <0.0001 | ** 0.0091  | **** <0.0001 |
| C.TNC:Alone vs. C.TNC:+LM7               | * 0.0425   | **** <0.0001 | **** <0.0001 | **** <0.0001 | **** <0.0001 | ns 0.0934  | **** <0.0001 |
| C.TNC:Alone vs. C.TNC.Zip18R:Alone       | ns >0.9999 | ** 0.0091    | ns 0.5882    | ns 0.9983    | ns 0.9554    | ns 0.9972  | * 0.0106     |
| C.TNC:Alone vs. C.TNC.Zip18R:+LM7        | ns >0.9999 | **** <0.0001 | **** <0.0001 | ns >0.9999   | **** <0.0001 | ** 0.0013  | **** <0.0001 |
| C.TNC:+LM7 vs. C.TNC.Zip18R:Alone        | * 0.0159   | ns 0.1256    | **** <0.0001 | **** <0.0001 | **** <0.0001 | ns 0.2753  | **** <0.0001 |
| C.TNC:+LM7 vs. C.TNC.Zip18R:+LM7         | ns 0.3221  | ns >0.9999   | ns 0.9998    | **** <0.0001 | ns 0.9999    | ns 0.3904  | ns 0.9993    |
| C.TNC.Zip18R:Alone vs. C.TNC.Zip18R:+LM7 | ns 0.9891  | * 0.0357     | **** <0.0001 | ns >0.9999   | **** <0.0001 | ** 0.0047  | **** <0.0001 |

**SFig 16. Exhaustion marker expression via flow cytometry.**  $1 \times 10^6$  NT, Zip18R, C.TNC-CAR, and C.TNC-CAR.Zip18R T cells were cultured in media or against LM7 cells at a 2:1 E:T ratio for 48 hours and then collected for flow cytometric analysis. **(A-C)** Expression of **(A)** LAG3, **(B)** PD1, and **(C)** CTLA4 on T cells gated on CD3 (NT), Zip18R+, C.TNC-CAR+, and C.TNC-CAR.Zip18R+ ( $n=3$ , mean + SEM), 2-way ANOVA, \*:  $p < 0.05$ , \*\*:  $p < 0.01$ , \*\*\*:  $p < 0.001$ , \*\*\*\*:  $p < 0.0001$ . **(D)** P-values from 2-way ANOVA analysis of Fig 5D-H and SFig 16A-C.

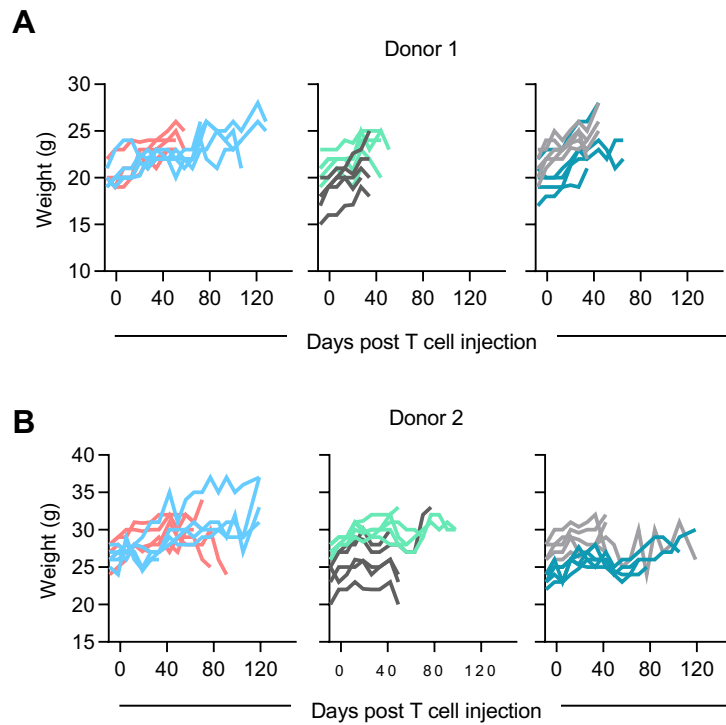

**SFig 17. Weight of mice for animal experiment shown Figure 5.** Body weights for each cohort measured weekly for **(A)** Donor 1 and **(B)** Donor 2 (n=5 per cohort per donor).

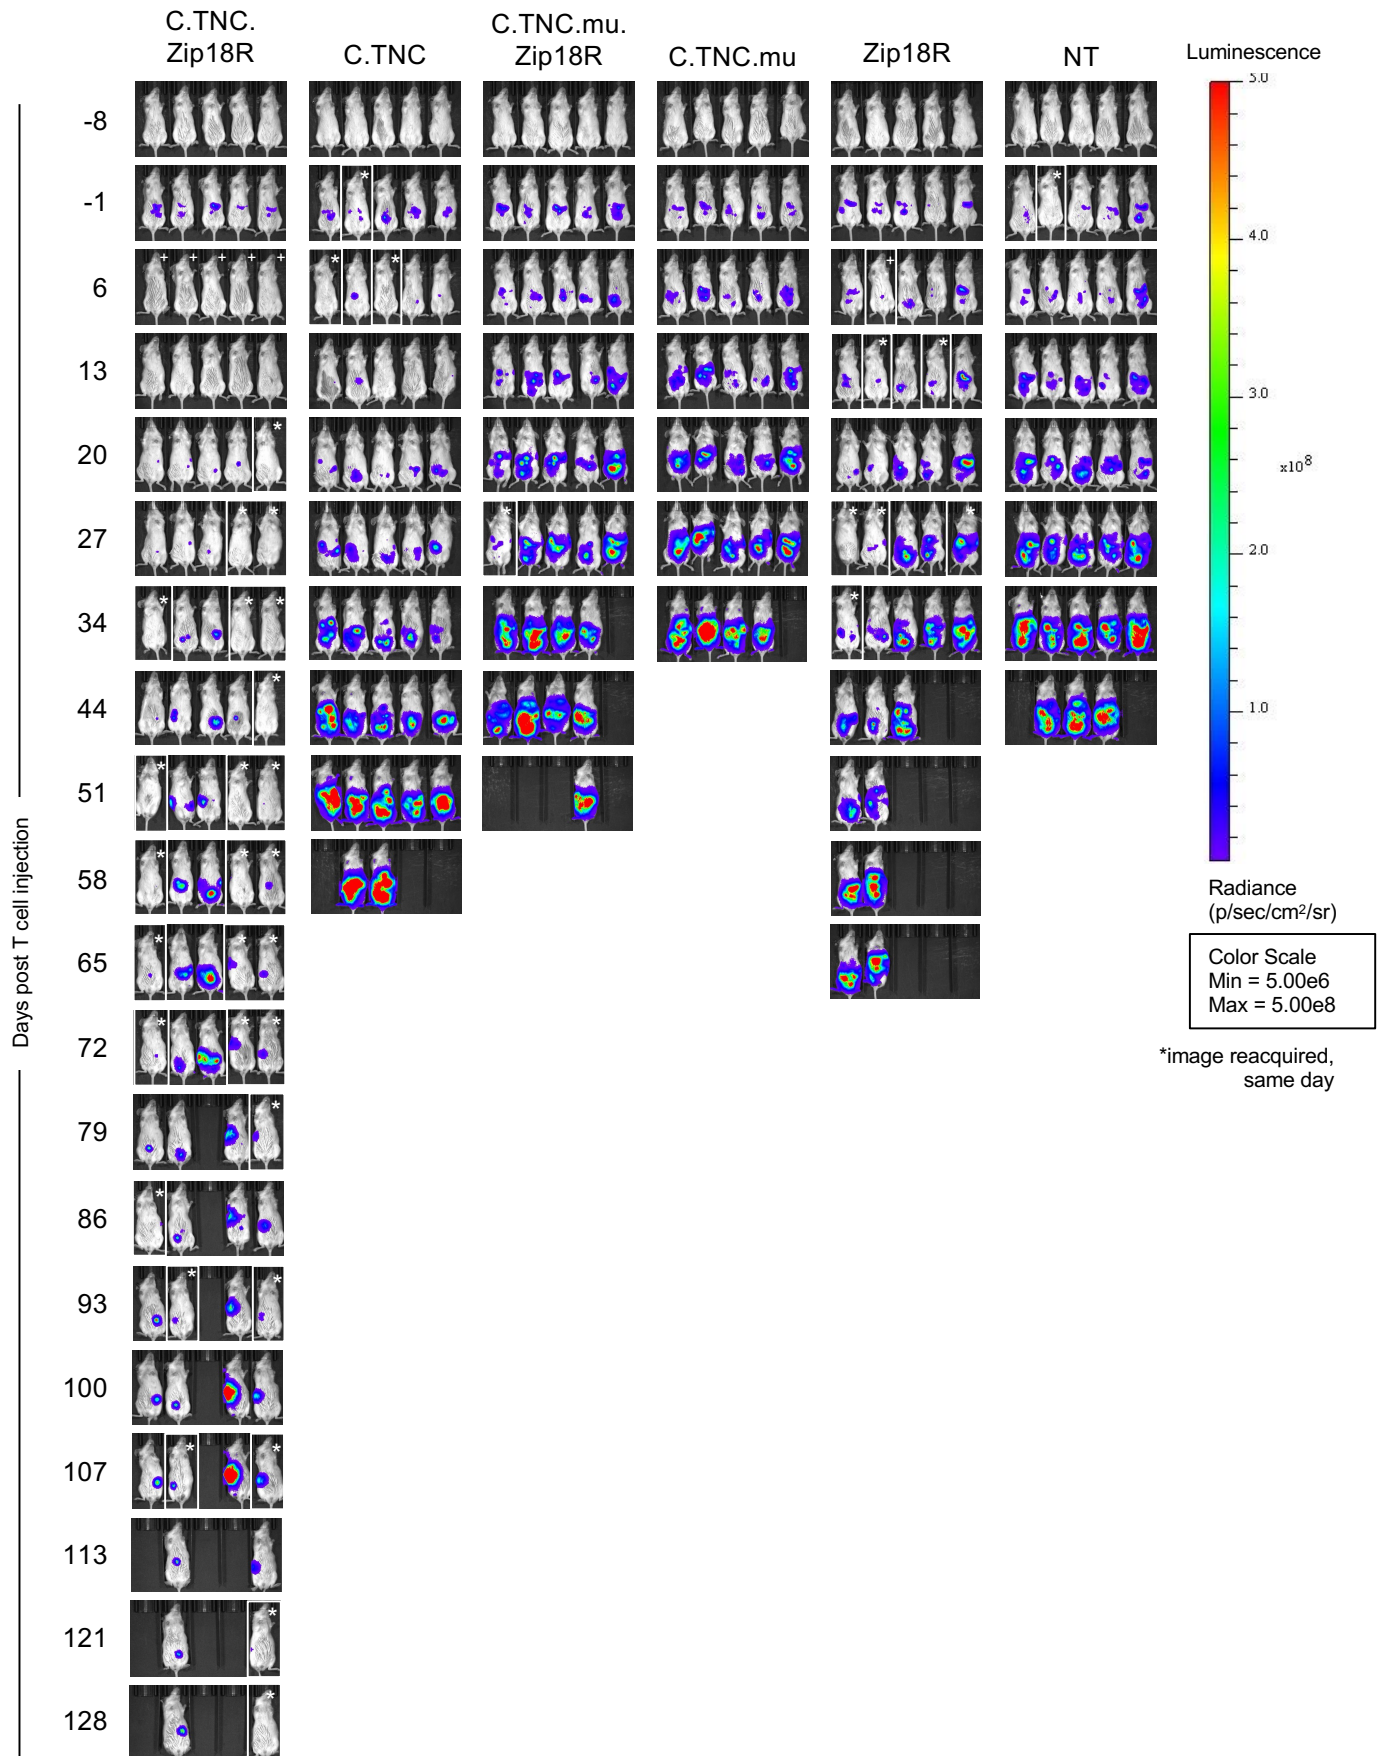

**SFig 18. Bioluminescence images for animal experiment shown in Figure 5 – Donor 1.**  
Bioluminescence images of mice.



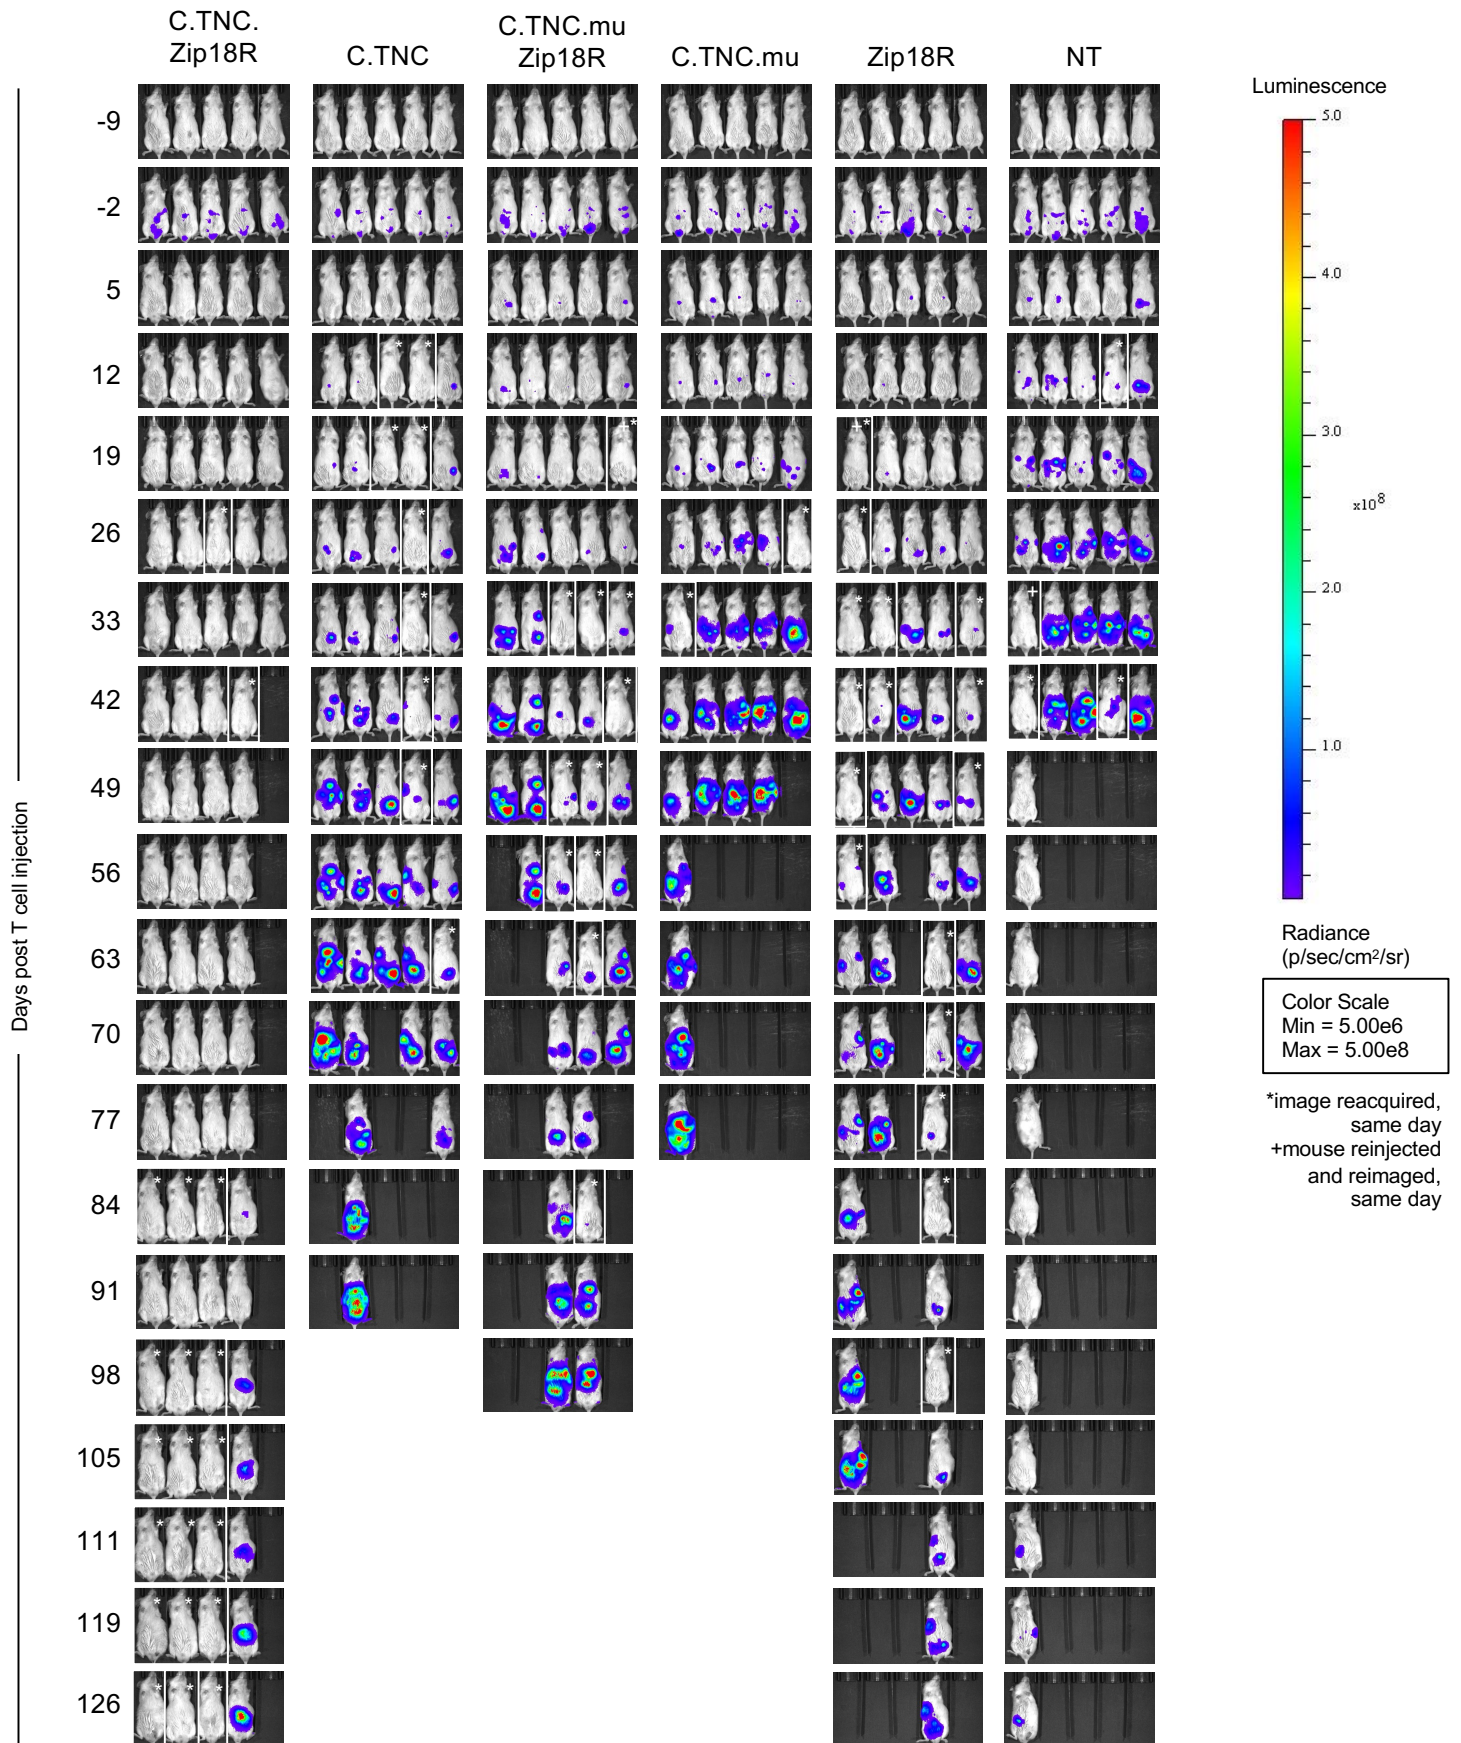

**SFig 19. Bioluminescence images for animal experiment shown in Figure 5 – Donor 2.**  
Bioluminescence images of mice.

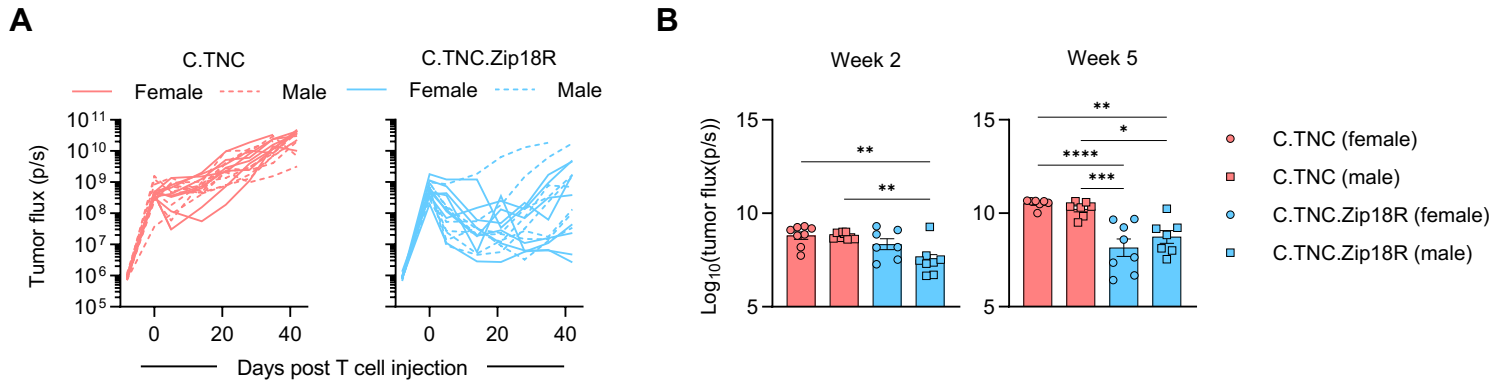

**SFig 20. Gender does not impact the antitumor activity of C.TNC-CAR.Zip18R T cells *in vivo*.**  $1 \times 10^6$  LM7.GFP.ffLuc cells were injected intraperitoneally (i.p.), followed by  $1 \times 10^6$  sorted T cells injected i.p. 7 days later in 5–6-week-old female and male NSG mice. Plots contain data from two biological donors. **(A)** Tumor flux values (n=8-10 per cohort). **(B)** Log-transformed tumor flux values summarized from A at weeks 2 and 5 (n=7-10, mean + SEM). One-way ANOVA, \*:p<0.05, \*\*:p<0.01, \*\*\*:p<0.001, \*\*\*\*:p<0.0001.

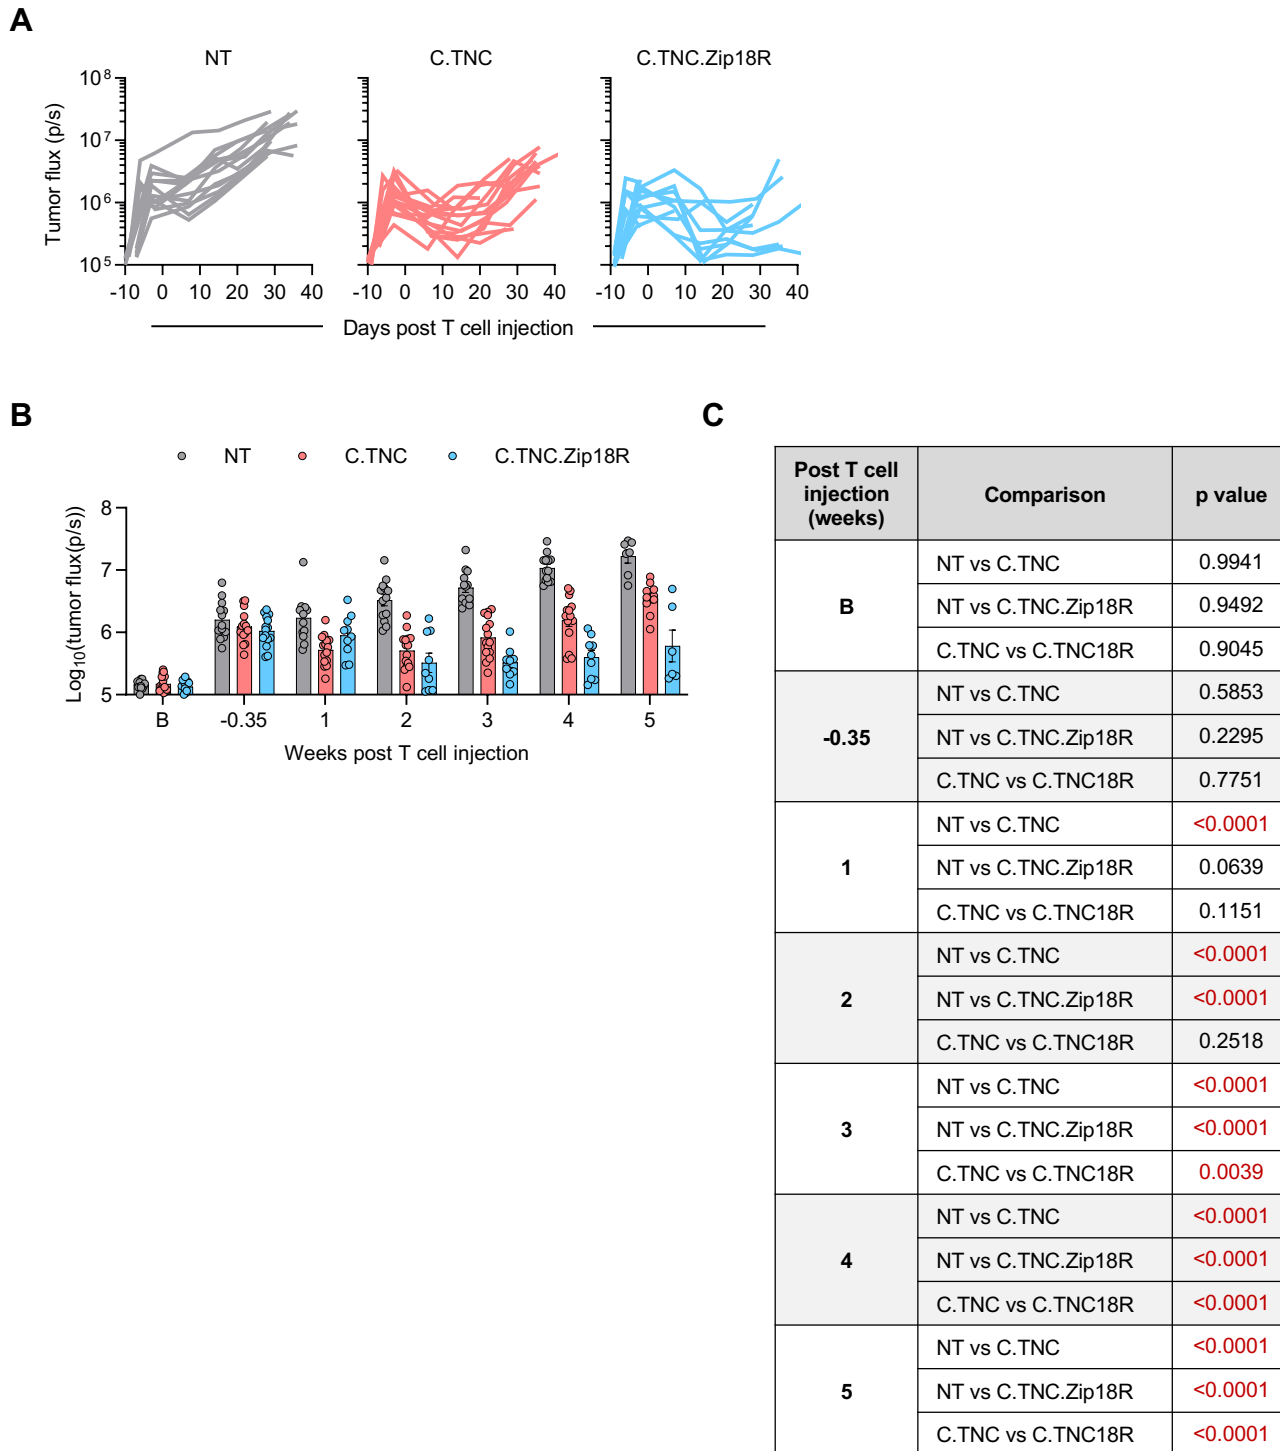

**SFig 21. C.TNC-CAR.Zip18R T cells show anti-DIPG activity.**  $1 \times 10^6$  DIPG.YFP.flLuc cells were injected intracranially (i.c.), followed by  $1 \times 10^6$  sorted T cells injected i.c. 7 days later in 10–12-week-old male NSG mice. Plots contain data from two biological donors from 3 experiments. **(A)** Tumor flux values ( $n=13-15$  per cohort). **(B)** Log-transformed tumor flux values summarized from A. ( $n=6-15$ , mean + SEM). B: baseline, pre-tumor image; Week -1: Days -2, -3; Week 1: Days 6-8; Week 2: Days 13-15; Week 3: Days 20-22; Week 4: Days 27-29; Week 5: Days 34-36. **(C)** Results from 2-way ANOVA analysis of B.
